# Supplementary material
Source: PubMed Central journal article supplement (PMC6324189)
Supplement: NIHMS1516353-supplement-Supporting_Information.pdf [file NIHMS1516353-supplement-Supporting_Information.pdf]

## Supporting information

### Contents

|                                                                                                         |   |
|---------------------------------------------------------------------------------------------------------|---|
| General Procedures .....                                                                                | 3 |
| Genome sequencing and bioinformatic Analysis.....                                                       | 3 |
| Construction of mutant strain <i>Streptomyces asterosporus</i> DSM 41452 :: pKC1132-InAnn3 ...          | 4 |
| Construction of mutant strain <i>Streptomyces asterosporus</i> DSM 41452 :: pUC19 $\Delta$ 3100spec.... | 4 |
| Generation of gene orf(-1) disruption mutant in <i>Streptomyces asterosporus</i> DSM 41452 .....        | 4 |
| Generation of gene sas1 disruption mutant in <i>Streptomyces asterosporus</i> DSM 41452 .....           | 5 |
| Generation of gene sas13 disruption mutant in <i>Streptomyces asterosporus</i> DSM 41452 .....          | 5 |
| Generation of gene sas16 disruption mutant in <i>Streptomyces asterosporus</i> DSM 41452 .....          | 5 |
| Generation of gene $\Delta$ Nmet mutant in <i>Streptomyces asterosporus</i> DSM 41452 .....             | 6 |
| Generation of gene $\Delta$ sas16 mutant in <i>Streptomyces asterosporus</i> DSM 41452.....             | 6 |
| Complementation of <i>Streptomyces asterosporus</i> DSM 41452 $\Delta$ sas16 strain with SAS16.....     | 7 |

|                                                                                                                                                                                                              |           |
|--------------------------------------------------------------------------------------------------------------------------------------------------------------------------------------------------------------|-----------|
| <b>Strain information, Fermentation, Extraction .....</b>                                                                                                                                                    | <b>7</b>  |
| <b>Isolation of Compound WS9326A, B, D, E, F, G, and Annimycin B .....</b>                                                                                                                                   | <b>8</b>  |
| <b>Sample analysis by HPLC-MS.....</b>                                                                                                                                                                       | <b>8</b>  |
| <b>NMR methods and General instrumentation for structural characterization .....</b>                                                                                                                         | <b>9</b>  |
| <b>Structure information of compound 1-7 .....</b>                                                                                                                                                           | <b>9</b>  |
| <b>Determination of the absolute configuration of WS9326A by Marfey's method .....</b>                                                                                                                       | <b>10</b> |
| <b>Antiparasite assay method and materials.....</b>                                                                                                                                                          | <b>10</b> |
| <b>Table S1. Primers fragments used in this study .....</b>                                                                                                                                                  | <b>10</b> |
| <b>Table S2. Plasmid information.....</b>                                                                                                                                                                    | <b>12</b> |
| <b>Table S3. Strain constructed and used in this study .....</b>                                                                                                                                             | <b>12</b> |
| <b>Table S4. Predicted highly conserved core motifs of A domain binding pockets in NRPSs within the SAS cluster .....</b>                                                                                    | <b>13</b> |
| <b>Table S5. List of putative biosynthesis genes involved in the biosynthesis of the side chain of the WS9326As and their homologues in the biosynthesis gene cluster of Skyllamycin<sup>[13]</sup>.....</b> | <b>13</b> |
| <b>Table S6: Proposed Functions of Open Reading Frames of WS9326As Biosynthesis Gene Cluster in Streptomyces asterosporus DSM41452. ....</b>                                                                 | <b>14</b> |
| <b>Table S7. Summary of NMR Data for WS9326A and WS9326F in DMSO-d<sub>6</sub> .....</b>                                                                                                                     | <b>15</b> |
| <b>Table S8. Summary of <sup>1</sup>H NMR(400MHz) and <sup>13</sup>C NMR(100MHz) Data for Annimycin B in CDCl<sub>3</sub>.....</b>                                                                           | <b>18</b> |
| <b>Figure S1.....</b>                                                                                                                                                                                        | <b>19</b> |
| <b>Figure S2.....</b>                                                                                                                                                                                        | <b>19</b> |
| <b>Figure S3.....</b>                                                                                                                                                                                        | <b>20</b> |
| <b>Figure S4.....</b>                                                                                                                                                                                        | <b>21</b> |
| <b>Figure S5.....</b>                                                                                                                                                                                        | <b>22</b> |
| <b>Figure S6.....</b>                                                                                                                                                                                        | <b>23</b> |
| <b>Figure S7.....</b>                                                                                                                                                                                        | <b>23</b> |
| <b>Figure S8.....</b>                                                                                                                                                                                        | <b>24</b> |
| <b>Figure S9.....</b>                                                                                                                                                                                        | <b>24</b> |
| <b>Figure S10.....</b>                                                                                                                                                                                       | <b>25</b> |
| <b>Figure S11.....</b>                                                                                                                                                                                       | <b>25</b> |
| <b>Figure S12.....</b>                                                                                                                                                                                       | <b>26</b> |
| <b>Figure S13.....</b>                                                                                                                                                                                       | <b>27</b> |
| <b>Figure S14.....</b>                                                                                                                                                                                       | <b>28</b> |
| <b>Figure S15.....</b>                                                                                                                                                                                       | <b>29</b> |

|                  |    |
|------------------|----|
| Figure S16.....  | 30 |
| Figure S17.....  | 31 |
| Figure S18.....  | 32 |
| Figure S19.....  | 33 |
| Figure S20.....  | 34 |
| Figure S21.....  | 35 |
| Figure S22.....  | 36 |
| Reference: ..... | 36 |

## General Procedures

All DNA isolation and manipulation procedures in *Escherichia coli* and *Streptomyces* were performed according to standard procedures. Primers were synthesized at Eurofins Co., Ltd. (Germany). Restriction enzymes and DNA ligase were purchased from NEB Biotechnology Co. Ltd. (England). Plasmid, gel extraction and cycle-pure kits were acquired from Promega Corporation (USA).

## Genome sequencing and bioinformatic Analysis

The complete genome of *Streptomyces asterosporus* DSM 41452 was sequenced using the Illumina HiSeq2000 technology, assembled and annotated by Shanghai Majorbio Biopharm Technology Co, Ltd.

(Shanghai, China). Prediction of the gene clusters was performed using antiSMASH (<http://antismash.secondarymetabolites.org/>). A large DNA fragment without any gaps was found to contain the putative *SAS* gene cluster. The orfs were determined by application of the FramePlot 4.0 beta program (<http://nocardia.nih.gov/jp/fp4/>). Protein sequences were compared with BLAST programs (<http://blast.ncbi.nlm.nih.gov/Blast.cgi>). Domain organization and substrate specificities for NRPSs were predicted by PKS/NRPS analysis software (<http://nrps.igs.umaryland.edu/>).

## Construction of mutant strain *Streptomyces asterosporus* DSM 41452 ::

### pKC1132-InAnn3

An internal fragment of gene *ann3* was amplified by PCR using the genomic DNA of *Streptomyces asterosporus* DSM 41452 as template with primers InAnn3-F and InAnn3-R. The PCR product was ligated into the EcoRV-digested pBluescript KS (-) to yield pBSK-InAnn3. After restriction enzyme digestion by HindIII and XbaI, the corresponding fragment was cloned into plasmid pKC1132 to yield plasmid pKC1132-InAnn3. Then this plasmid was introduced into *Streptomyces asterosporus* DSM 41452 by intergeneric conjugation. An apramycin-resistant (50ug/ml) mutant was isolated. Apramycin-sensitive colonies were tested for target gene disruption by colony PCR using primers Vann3-F and Apra-R (Table S1).

## Construction of mutant strain *Streptomyces asterosporus* DSM 41452 ::

### pUC19Δ3100spec

The plasmid pUC19Δ3100spec (See the Table S2) was introduced into *Streptomyces asterosporus* DSM 41452 by intergeneric conjugation. A spectinomycin-resistant (100 ug/ml) mutant was isolated. Spectinomycin-sensitive colonies were tested for target gene disruption by colony PCR using primers V3100-F and Vaad-R (Table S1).

## Generation of gene *orf(-1)* disruption mutant in *Streptomyces asterosporus*

### DSM 41452

An internal fragment of gene *orf(-1)* was amplified by PCR using the genomic DNA of *Streptomyces asterosporus* DSM 41452 as template with primer pair Orf(-1)-F and Orf(-1)-R. The PCR product was ligated into the EcoRV-digested pBluescript SK (-) to yield pBSK-*orf(-1)*. After restriction enzyme digestion by HindIII and XbaI, the corresponding fragment was cloned into plasmid pKC1132 to yield plasmid pKC1132-*orf(-1)*. pKC1132-*orf(-1)* was introduced into *Streptomyces asterosporus* DSM 41452 by intergeneric conjugation. An apramycin-resistant (50ug/ml) mutant was isolated. Apramycin-sensitive colonies were tested for target gene disruption by colony PCR using primers VluxR1-F and Apra-R (Table S1).

## Generation of gene *sas1* disruption mutant in *Streptomyces asterosporus*

### DSM 41452

An internal fragment of gene *sas1* was amplified by PCR using the genomic DNA of *Streptomyces asterosporus* DSM 41452 as template with primers LuxR2-F and LuxR2-R. The PCR product was ligated into the EcoRV-digested pBluescript SK (-) to yield pBSK-SAS1. After restriction enzyme digestion by HindIII and XbaI the corresponding fragment was cloned into the plasmid pKC1132 to yield plasmid pKC1132-SAS1. Then pKC1132-SAS1 was introduced into *Streptomyces asterosporus* DSM 41452 by intergeneric conjugation. The correct exconjugants carrying plasmid were screened for resistance against apramycin (50 ug/ml). Apramycin-sensitive colonies were tested for target gene disruption by colony PCR using primers VluxR2-F and Apra-R (Table S1).

## Generation of gene *sas13* disruption mutant in *Streptomyces asterosporus*

### DSM 41452

An internal fragment of gene *sas13* was amplified by PCR using the genomic DNA of *Streptomyces asterosporus* DSM 41452 as template with primers SAS13F and SAS13R. The PCR product was ligated into the EcoRV-digested pBluescript SK (-) to yield pBSK-SAS13. The insertion fragment was excised by HindIII/XbaI restriction enzyme and subcloned into vector pKC1132 to generate plasmid pKC1132-SAS13. After conjugation of this plasmid into *Streptomyces asterosporus* DSM 41452, an apramycin-resistant mutant named *Streptomyces asterosporus* :: pKC1132-SAS13 was obtained. The correct exconjugants carrying plasmid were screened for resistance against apramycin (50 ug/ml). Apramycin-sensitive colonies were tested for target gene disruption by colony PCR using primers Vsas13-F and Apra-R (Table S1).

## Generation of gene *sas16* disruption mutant in *Streptomyces asterosporus*

### DSM 41452

An internal fragment of gene *sas16* was amplified by PCR using the genomic DNA of *Streptomyces asterosporus* DSM 41452 as template with primers P450S-F and P450S-R. The PCR product was ligated into the EcoRV-digested pBluescript SK(-) to yield pBSK-SAS16. The insertion fragment was excised by HindIII/XbaI fragment and subcloned into vector pKC1132 to generate plasmid pKC1132-SAS16. After conjugation of this plasmid into *Streptomyces asterosporus* DSM 41452, an apramycin-resistant mutant named *Streptomyces asterosporus* DSM 41452 :: pKC1132-SAS16 was obtained. The correct exconjugants carrying plasmid were screened for resistance against apramycin(50ug/ml). Apramycin-sensitive colonies were tested for target gene disruption by colony PCR using primers Vsas16-F and Apra-R (Table S1).

## Generation of gene $\Delta$ Nmet mutant in *Streptomyces asterosporus* DSM

### 41452

A 4800bp DNA fragment including the domain encoding methyltransferase and its flanking region in gene *sas17* was amplified from the genome of *Streptomyces asterosporus* DSM 41452 by PCR using primers Nmet4800bpF and Nmet4800bpR (Table S1). The PCR product was ligated into the EcoRV-digested pBluescript SK(-) to yield pBSK-Nmet. The loxP-site-flanked apramycin resistance cassette from plasmid pLRECEJ was amplified by PCR using primers Nmet-*ApraF* and Nmet-*ApraR*. The resulting amplicon was used to replace the methyltransferase encoding sequence of pBSK-Nmet by recombination in *E. coli* BW25113 cell containing  $\lambda$  RED plasmid pIJ790, yielding pBSK-Nmet::*aac(3)IV*. The latter was amplified by PCR using primers Nmet4800bpF and Nmet4800bpR. The resulting fragment was cloned into the EcoRV-digested pKGLP2-GusA to generate pKGLP2-GusA-Nmet::*aac(3)IV*.

The wildtype *Streptomyces asterosporus* DSM 41452 was conjugated with *E. coli* ET 12567 (pUZ8002) harboring plasmid pKGLP2-GusA-Nmet::*aac(3)IV*, then the correct exconjugants carrying plasmid pKGLP2-gusA Nmet::*aaa(3)IV* were selected by antibiotic resistance screening against apramycin(50 ug/ml). In order to generate the mutant strain with double-crossover, initial conjugants were incubated at 28°C for 4 days, and then screened for the apramycin resistance and hygromycin sensitivity. Replacement of Nmet domain encoding gene with *aac(3)IV* in *Streptomyces asterosporus* DSM 41452  $\Delta$  Nmet::*aac(3)IV* was confirmed by PCR using primers Nmet4800bpF and Nmet4800bpR (Table S1).

The Cre recombinase expression plasmid pUWLCre was then introduced into *Streptomyces asterosporus* DSM 41452  $\Delta$ Nmet::*aac(3)IV* to eliminate *aac(3)IV* gene from its genome. The resulting conjugants resistant to hygromycin were incubated on MS solid medium plates and selected for the apramycin sensitivity. Then the hygromycin resistance colony was cultured into liquid TSB medium at 37°C, then it was repeatedly passaged three times. Hygromycin-sensitive colonies were tested for the loss of plasmid pUWLCre. The correct excision of *aac(3)IV* gene from the genome of *Streptomyces asterosporus* DSM 41452  $\Delta$ Nmet genome was confirmed by PCR using primers Nmet4800bpF and Nmet4800bpR (Table S1).

## Generation of gene $\Delta$ *sas16* mutant in *Streptomyces asterosporus* DSM

### 41452

A 4472bp DNA fragment including gene *sas16* and its flanking regions was amplified from the genome of *Streptomyces asterosporus* DSM 41452 by PCR using primers SAS16F and SAS16R. The PCR product was ligated into the EcoRV-digested pBluescript SK (-) to yield pBSK-SAS16. The loxP-site-flanked apramycin resistance cassette from plasmid pLRECEJ was amplified with the pair of primer SAS16-*ApraF* and SAS16-*ApraR*. The resulting amplicon was used to replace the coding sequence of *SAS16* in pBSK-SAS16 by gene recombination in *E. coli* BW25113 cell containing  $\lambda$  RED plasmid pIJ790, yielding pBSK-SAS16::*aac(3)IV*.

The latter was amplified using primers SAS16F and SAS16R, the resulting fragment was cloned into the EcoRV-digested pKGLP2-GusA to afford pKGLP2-GusA-SAS16::aac(3)IV.

*Streptomyces asterosporus* DSM 41452 was conjugated with *E. coli* ET 12567 (pUZ8002) harboring plasmid pKGLP2-GusA-SAS16::aac(3)IV, the correct exconjugants carrying plasmid pKGLP2-GusA-SAS16::aac(3)IV were screened for resistance against apramycin (50 ug/ml). To generate the mutant strain containing a double-crossover, initial conjugants were incubated at 28°C for 4 days and then screened for apramycin resistance and hygromycin sensitivity. Replacement of SAS16 with aac(3)IV in *Streptomyces asterosporus* DSM 41452  $\Delta$ sas16::aac(3)IV was confirmed by PCR using primers SAS16F and SAS16R (Table S1).

The Cre recombinase expression plasmid pUWLCre was then introduced into *Streptomyces asterosporus* DSM 41452  $\Delta$ sas16::aac(3)IV to eliminate aac(3)IV gene from its genome. The resulting exconjugants resistant to hygromycin were incubated on MS solid medium plates and selected for the apramycin sensitivity. Then the hygromycin resistance colony was cultured into the TSB medium at 37°C, and was repeatedly passaged three times. Then hygromycin-sensitive colonies were tested for the loss of plasmid pUWLCre. The correct in-frame excision of aac(3)IV gene from the *Streptomyces asterosporus* DSM 41452  $\Delta$ sas16 genome was confirmed by PCR using primers SAS16F and SAS16R (Table S1).

## Complementation of *Streptomyces asterosporus* DSM 41452 $\Delta$ sas16

### strain with SAS16

To construct plasmid pTESa-SAS16, a 1272bp fragment carrying entire *sas16* with its upstream 48bp region was amplified from *Streptomyces asterosporus* DSM 41452 genomic DNA using primers KpnI-RBSp450-F and EcoRI-p450-R. The 1272bp fragment was firstly cloned into EcoRV-digested pBluescript SK(-) to yield pBSK-SAS16. Then this pBSK-SAS16 was digested with KpnI and EcoRI, and then DNA fragment was ligated to pTESa with a constitutive promoter *ermEp*, yielding plasmid pTESa-SAS16. *Streptomyces asterosporus* DSM 41452  $\Delta$ sas16 exconjugants carrying the plasmid pTESa-SAS16 were screened from MS plate with apramycin resistance (50 ug/ml).

### Strain information, Fermentation, Extraction

The wildtype strain *Streptomyces asterosporus* DSM41452 was purchased from Leibniz Institute DSMZ-German Collection of Microorganisms and cell Cultures, Germany. The initial cultures were maintained on the Tryptic soy broth (TSB) solid medium (Tryptone 17g, Bacto Soytone 3g, Glucose 2.5g, Sodium Chloride 5g, K<sub>2</sub>HPO<sub>4</sub> 2.5g, Tap water 1000mL, pH 7.3). A small loop of spores growing on a TSB solid plate was inoculated into a 250 mL Erlenmeyer flask containing 75 mL liquid productive SG medium (Soy peptone 10.0 g, Glucose 20.0 g, L-Valine 2.34 g, CaCO<sub>3</sub> 2.0 g, CoCl<sub>2</sub>-solution 1mg/mL 1 mL, Tap water 1000 mL, pH7.2) and cultured at 28 °C for 3 days on a rotary shaker at 180 r·min<sup>-1</sup>. Then, 10 mL of the preculture (at a volume ratio of 1:100) was inoculated into a 500 mL Erlenmeyer flask (40 flasks) containing 150 mL of the SG medium, then incubated for 4 days, 180rpm, 28°C. The fermentation broth (6L) was filtered

through high speed centrifugation (8000 rpm, 10min, 22°C), yielding the supernatant and cell pellet. Then the supernatant was extracted by double volume ethyl acetate using a separating funnel, then this organic solvent was evaporated under reduced pressure. The mycelium also was extracted by acetone, which was evaporate under reduced pressure. The crude extract from the supernatant and the cell pellet were combined.

## Isolation of Compound WS9326A, B, D, E, F, G, and Annimycin B

The crude extract (~5g) was dissolved in 15 mL MeOH and fractionated by reversed-phase (RP) C18 liquid chromatography (Oasis® HLB 20 / 35cc), the starting elution solvent is 5% methanol, then the column was eluted using a stepwise gradient MeOH (30%, 40%, 50%, 60%, 70%, 80, 90% and 100%). Fractions afforded from SPE column were analyzed by LC-MS. Among those fractions, fractions (Nr.22-27) were subsequently subjected to a further purification by a semi-preparative HPLC (Agilent Technologies), equipped with a Waters ZORBAX SB-C18 column (9.4 x 150 mm, 5 µm) and a Zorbax 80SB-C8 guard column (9.4 x 15 mm, 7 µm), the fraction was eluted by an isocratic method (60% CH<sub>3</sub>CN-40% H<sub>2</sub>O, each solvent contains 0.5% acetic acid; flow rate 1 mL/min), to yield compounds WS9326A (10mg), WS9326B (4.9mg), WS9326D (10.9mg), WS9326E (2.4mg), WS9326F (9.4mg), and WS9326G (4.8mg). For purification of compound Annimycin B, the crude extract (~2g) of the cell culture of *Streptomyces asterosporus* DSM 41152 :: pUC19Δ3100spec was obtained using the same fermentation and extraction methods mentioned above. The crude extract firstly was dissolved in methanol, then it was subjected onto a silica gel column (40g separating silica gel) eluting with CH<sub>2</sub>Cl<sub>2</sub>-MeOH (100: 0-0: 100). The fractions (Fr.1-Fr.48) were collected and analyzed by LC-MS, the fractions(Fr.1-Fr.6) were combined and subjected to a silica gel column (10g separating gel) eluting with cyclohexane-ethyl acetate (100:0-0:100). The fractions were analyzed by LC-MS, and the subfractions containing target mass were further separated by semi-preparative HPLC, the fractions were eluted by an isocratic method (75% CH<sub>3</sub>CN-25% H<sub>2</sub>O, each solvent contains 0.5% acetic acid; flow rate 1.5 mL/min), to yield compound Annimycin B(7.3mg).

## Sample analysis by HPLC-MS

The organic phase was evaporated, resuspended in MeOH(1mL), and filtered through syringe filters (LLG, PVDF, 0.45µm) prior to LC-MS analysis. HPLC-MS analysis was performed on an Agilent 1100 series LC/MS system with electrospray ionization (ESI) and detection in the positive and negative modes. The LC system was equipped with a X Bridge C18 column (3.5 µm particle size; 4.6 x 100 mm) and a Zorbax XDB-C18 guard column (5-µm particle size; 12.5 x 4.6 mm; Agilent), maintained at room temperature. Detection wavelengths of the diode array detector were 254/360 nm, 480/800 nm, 360/580 nm, and 430/600 nm. The mobile system consisted of solvent A (acetic acid [0.5%, vol/vol] in acetonitrile) and solvent B (acetic acid [0.5%, vol/vol]). A 10 µL aliquot of the MeOH-soluble extract was injected for analysis each sample, a gradient elution method was used (A: CH<sub>3</sub>CN with 0.1% HAC; B: H<sub>2</sub>O with 0.1% HAC; 5% A over 4 min, 5–95% A from 4 to 20 min, 95% A from 20 to 22 min, 95-5% A from 22 to 23 min, and 5% A from 23 to 30 min; 0.5mL/min). MSD settings during the LC gradient were as follows: Acquisition—mass range m/z 150–



1000, MS scan rate  $1\text{s}^{-1}$ , MS/MS scan rate  $2\text{s}^{-1}$ , fixed collision energy 20 eV; ion source drying gas temperature 350 °C, drying gas flow 10 L/min; Nebulizer pressure 35 psig; ion source mode API-ES; capillary voltage 3000; The MS detector was autotuned using Agilent tuning solution in positive and positive mode before measurement. LC (DAD) and MS data were analyzed with ChemStation software (Agilent).

## NMR methods and General instrumentation for structural characterization

Nuclear magnetic resonance (NMR) was employed to elucidate the structures of Compound WS9326A, B, D, E, F, G, Annimycin B. The 1D NMR spectra [ $^1\text{H}$  NMR(400 MHz) and  $^{13}\text{C}$  NMR (100 MHz)] and 2D NMR spectra [ $^1\text{H}/^1\text{H}$ -COSY, HSQC and HMBC] of these compounds were detected on a Varian VNMR-S 600-MHz spectrometer in 150  $\mu\text{l}$  DMSO- $d_6$  at  $T = 35^\circ\text{C}$  or  $25^\circ\text{C}$ . Residual solvent signals were used as an internal standard (DMSO- $d_6$ :  $\delta_{\text{H}} = 2.5\text{ppm}$ ,  $\delta_{\text{C}} = 39.5\text{ppm}$ ). For WS9326F, WS9326G and Annimycin B, their high-resolution electron spray ionization mass spectra (HR-ESI-MS) were measured on a LTQ Orbitrap XL (Thermo Scientific).

## Structure information of compound 1-7

**WS9326A (1):** White amorphous powder; UV(MeOH)  $\lambda_{\text{max}}$  231 nm, 288 nm; ESI-MS  $m/z$   $[\text{M}-\text{H}]^-$  1035,  $[\text{M}+\text{Cl}]^-$  1071, (calcd. for  $\text{C}_{54}\text{H}_{68}\text{N}_8\text{O}_{13}$ , 1036.49);  $^1\text{H}$ -NMR (400 MHz, DMSO- $d_6$ ) and  $^{13}\text{C}$ -NMR (100 MHz, DMSO- $d_6$ ) data are shown in Table S7.

**WS9326B (2):** White amorphous powder; UV(MeOH)  $\lambda_{\text{max}}$  212 nm, 290 nm; ESI-MS  $m/z$   $[\text{M}-\text{H}]^-$  1037,  $[\text{M}+\text{Cl}]^-$  1073, HRESI-MS  $m/z$   $[\text{M}+\text{H}]^+$  1039.0229 (calcd. for  $\text{C}_{54}\text{H}_{70}\text{N}_8\text{O}_{13}$ , 1038.51);

**WS9326D (3):** White amorphous powder; UV(MeOH)  $\lambda_{\text{max}}$  209 nm, 289 nm; ESI-MS  $m/z$   $[\text{M}-\text{H}]^-$  852.4(calcd. for  $\text{C}_{47}\text{H}_{59}\text{N}_5\text{O}_{10}$ , 853.43);

**WS9326E (4):** White amorphous powder; UV(MeOH)  $\lambda_{\text{max}}$  222 nm, 291 nm; ESI-MS  $m/z$   $[\text{M}-\text{H}]^-$  838.4(calcd. for  $\text{C}_{46}\text{H}_{57}\text{N}_5\text{O}_{10}$ , 839.41);

**WS9326F (5):** White amorphous powder; UV(MeOH)  $\lambda_{\text{max}}$  210 nm, 290 nm; ESI-MS  $m/z$   $[\text{M}-\text{H}]^-$  966.4, HRESI-MS  $m/z$   $[\text{M}+\text{H}]^+$  968.4750 (calcd. for  $\text{C}_{51}\text{H}_{65}\text{N}_7\text{O}_{12}$ , 967.47);  $^1\text{H}$ -NMR (400 MHz, DMSO- $d_6$ ) and  $^{13}\text{C}$ -NMR (100 MHz, DMSO- $d_6$ ) data are shown in Table S7.

**WS9326G (6):** White amorphous powder; UV(MeOH)  $\lambda_{\text{max}}$  225 nm, 293 nm; ESI-MS  $m/z$   $[\text{M}-\text{H}]^-$  952.4, HRESI-MS  $m/z$   $[\text{M}+\text{H}]^+$  954.4644(calcd. for  $\text{C}_{50}\text{H}_{63}\text{N}_7\text{O}_{12}$ , 953.45);

**Annimycin B (7):** yellow amorphous powder; UV(MeOH)  $\lambda_{\text{max}}$  326 nm; ESI-MS  $m/z$   $[\text{M}-\text{H}]^-$  260,  $[\text{M}+\text{H}]^+$  262, HRESI-MS  $m/z$   $[\text{M}+\text{H}]^+$  262.1446 (calcd. for  $\text{C}_{15}\text{H}_{19}\text{NO}_3$ , 261.14);  $^1\text{H}$ -NMR (400 MHz, DMSO- $d_6$ ) and  $^{13}\text{C}$ -NMR (100 MHz, DMSO- $d_6$ ) data are shown in Table S8.

## Determination of the absolute configuration of WS9326A by Marfey's method

The Marfey's method was carried out following the previous protocol<sup>[1]</sup>, and the Marfey's reagent was purchased from Thermo Scientific (Number 48895). The amino acid standards involved in the assembly of WS9326A were obtained commercially from Carl Roth or Sigma-Aldrich. Each of them (1 mg) were dissolved in 100  $\mu$ l H<sub>2</sub>O, respectively. Then the amino acids were derivatized by adding 1 M NaHCO<sub>3</sub> (40  $\mu$ l) and 1% FDAA (in acetone, 200  $\mu$ l). The reaction mixture was heated at 40°C for 1 hour, then the mixture was neutralized with 2 M HCl after cooling at room temperature. The derivatives were then dried and redissolved in CH<sub>3</sub>OH, then analyzed by HPLC-MS (ESI+ mode, Zorbax Eclipse XDB-C18 column, 100 x 4.6 mm), a gradient elution method was used (A: CH<sub>3</sub>CN with 0.1% HAC; B: H<sub>2</sub>O with 0.1% HAC; 10%-40%-90% CH<sub>3</sub>CN in 50 min, 0.5 ml/min at 25°C, detection at wavelengths of 270 nm, and 340 nm, *m/z* range from 100-2000). WS9326A (0.5 mg) was hydrolyzed with 2 M HCl (2.0 mL) at 45°C for 2 hours. The solution was evaporated to dryness, and derivatized with Marfey's reagent. The derivatives of WS9326A acid hydrolysates were analyzed by LC-MS. The retention times of amino acid standards derivitized with Marfey's reagent are as follows: 21.71 min (L-threonine), 19.48 min (L-asparagine), 41.92 min (L-leucine), 21.87 min (L-allo-threonine), 20.31 min (L-serine), 44.55 min (D-phenylalanine).

## Antiparasite assay method and materials

Asexual, blood-stage parasites were cultured *in vitro* using standard conditions<sup>[2]</sup>. Briefly, parasites were maintained in 2% human O+ erythrocytes (Interstate Blood Bank, Memphis, TN) in RPMI-1640 medium (Life Technologies, Grand Island, NY) supplemented with 0.5% Albumax (Life Technologies), 24 mmol/L sodium bicarbonate, and 10  $\mu$ g/mL gentamycin. Tissue culture flasks were incubated at 37 °C under a gas mixture of 5% CO<sub>2</sub>, 5% O<sub>2</sub>, and 90% N<sub>2</sub>. Cultures were screened for mycoplasma using the Universal Mycoplasma Detection Kit (ATCC, Manassas, VA).

*In vitro* drug responses were measured using 72-hr SYBR Green staining assays as described previously with minor modifications<sup>[3]</sup>. Parasites were diluted to 0.5% final parasitemia with 2% final hematocrit. The diluted parasite culture (100  $\mu$ L) was added to duplicate test wells in a 96-well plate containing 100  $\mu$ L of the drug tested. IC<sub>50</sub> values were determined by nonlinear regression analysis using Prism 5.0 software (GraphPad Software, San Diego, CA). Drug assays were performed on three independent occasions.

## Table S1. Primers fragments used in this study

| Name | Sequence |
|------|----------|
|------|----------|

|                                                                                                                                                                   |                                                             |
|-------------------------------------------------------------------------------------------------------------------------------------------------------------------|-------------------------------------------------------------|
| Primer for vector construction of pKC1132-InAnn3                                                                                                                  |                                                             |
| InAnn3-F                                                                                                                                                          | CCGCTGAACGTCATGTCCGACCGC                                    |
| InAnn3-R                                                                                                                                                          | CGTTCCGACCGCGCACCACGA                                       |
| Primer for vector construction of pKC1132-orf(-1)                                                                                                                 |                                                             |
| Orf(-1)-F                                                                                                                                                         | GTCGGTGACGCCGTCGCCC                                         |
| Orf(-1)-R                                                                                                                                                         | GAGATGTGCAGCTTCTCCGCGATG                                    |
| Primer for vector construction of pKC1132-SAS1                                                                                                                    |                                                             |
| LuxR2-F                                                                                                                                                           | CGCCATGACGCGTCCACCGTG                                       |
| LuxR2-R                                                                                                                                                           | GGTGCGGACGCTGCATCCCAGAC                                     |
| Primer for vector construction of pKC1132-SAS16                                                                                                                   |                                                             |
| P450S-F                                                                                                                                                           | ATATaagcttGCGCCGACGGGAAGTCTCGAC                             |
| P450S-R                                                                                                                                                           | ATATggatccTGGTGGACGCCGTAGCCGAAC                             |
| Primer for vector construction of pKC1132-SAS13                                                                                                                   |                                                             |
| SAS13F                                                                                                                                                            | ATATaagcttCCGTGACGCGGCTTCGTGCT                              |
| SAS13R                                                                                                                                                            | ATATtctagaGCACCTCGCCGAAGAAGCGG                              |
| PCR verification for gene <i>ann3</i> disruption                                                                                                                  |                                                             |
| Vann3-F                                                                                                                                                           | GTA <del>CTTCGGGGT</del> GCTGGCGGCC                         |
| Apra-R                                                                                                                                                            | AGCTCAGCCAATCGACTGGCGAG                                     |
| PCR verification for gene <i>orf3100</i> disruption                                                                                                               |                                                             |
| V3100-F                                                                                                                                                           | TGGTCTCCGCGGGCAGGAGCCAGAA                                   |
| Vaad-R                                                                                                                                                            | GTCGATCGTGGCTGGCTCGAAGATAC                                  |
| PCR verification for gene <i>orf(-1)</i> disruption                                                                                                               |                                                             |
| VluxR1-F                                                                                                                                                          | ACGGAGATCCGGGTGAGCCTGCG                                     |
| Apra-R                                                                                                                                                            | AGCTCAGCCAATCGACTGGCGAG                                     |
| PCR verification for gene <i>sas1</i> disruption                                                                                                                  |                                                             |
| VluxR2-F                                                                                                                                                          | AATCCGCCGACGGAGGAGGACACC                                    |
| Apra-R                                                                                                                                                            | AGCTCAGCCAATCGACTGGCGAG                                     |
| PCR verification for gene <i>sas16</i> disruption                                                                                                                 |                                                             |
| Vsas16-F                                                                                                                                                          | AGTCATGGGTCTGTCCACTCCAGTA                                   |
| Apra-R                                                                                                                                                            | AGCTCAGCCAATCGACTGGCGAG                                     |
| PCR verification for gene <i>sas13</i> disruption                                                                                                                 |                                                             |
| Vsas13-F                                                                                                                                                          | CGCACTCCGGGGACGTGGTGACC                                     |
| Apra-R                                                                                                                                                            | AGCTCAGCCAATCGACTGGCGAG                                     |
| Primers for in-frame deletion of <i>sas16</i> by $\lambda$ Red-mediated recombination                                                                             |                                                             |
| SAS16F                                                                                                                                                            | ATATaagctcCCGACTACACCGGCATCCTC 3'                           |
| SAS16R                                                                                                                                                            | ATATgaattcGCTCGTCTCCACCGTGTC 3'                             |
| SAS16- <i>Apra</i> F                                                                                                                                              | CGCAAGAAATGACCTCAGCTCAGATATAGGGGTAACGTCATGGATATCTCTAGATACCG |
| SAS16- <i>Apra</i> R                                                                                                                                              | GATGCAGCGGTGCGGTTGGCGTGAACCTTCATGGCGCCTAAACAAAAGCTGGAGCTC   |
| Primers for in-frame deletion of N-methyltransferase domain in <i>sas17</i> gene by $\lambda$ Red-mediated recombination                                          |                                                             |
| Nmet4800bpF                                                                                                                                                       | GACCTGGTCGGCTTCCTCGT                                        |
| Nmet4800bpR                                                                                                                                                       | GTCGGCGCGGTAGGTGAAG                                         |
| Nmet- <i>Apra</i> F                                                                                                                                               | GAGAACTTCGCCGGCTGGCACAGCAGTTACGACGGCTCGGTGGATATCTCTAGATACCG |
| Nmet- <i>Apra</i> R                                                                                                                                               | CAGGCCAGGACGGGCACCGAGGCGAGGGAGACGGCTTCCGCAACAAAAGCTGGAGCTC  |
| Primer for amplifying a 1224bp fragment carrying the entire <i>sas16</i> with its upstream 48bp region from the <i>Streptomyces asterosporus</i> DSM 41452 genome |                                                             |

|                |                                |
|----------------|--------------------------------|
| KpnI-RBSp450-F | GGTACCGGATCGGCCCGCAAGAAATGA    |
| EcoRI-p450-R   | GAATTCCTACCAGCCGATCGTCAGCTTGTG |

Table S2. Plasmid information

| Name                                    | Description                                                                                                                                | Reference  |
|-----------------------------------------|--------------------------------------------------------------------------------------------------------------------------------------------|------------|
| <b>pIJ790</b>                           | $\lambda$ -Red plasmid, temperature sensitive replicon, Cm <sup>r</sup>                                                                    | [4]        |
| <b>pBluescript SK(-)</b>                | Cloning vector, <i>lacZ</i> ( $\alpha$ -complementation), Amp <sup>r</sup>                                                                 | Stratagene |
| <b>pKC1132</b>                          | Conjugative vector, Non-replicative in <i>Streptomyces</i> , Apra <sup>r</sup>                                                             | [5]        |
| <b>pKC1132-orf(-1)</b>                  | Vector for gene disruption of <i>orf(-1)</i> , based on pKC1132, Apra <sup>r</sup>                                                         | This study |
| <b>pKC1132-SAS1</b>                     | Vector for gene disruption of <i>sas1</i> , based on pKC1132, Apra <sup>r</sup>                                                            | This study |
| <b>pKC1132-SAS16</b>                    | Vector for gene disruption of <i>sas16</i> , based on pKC1132, Apra <sup>r</sup>                                                           | This study |
| <b>pKC1132-SAS13</b>                    | Vector for gene disruption of <i>sas13</i> , based on pKC1132, Apra <sup>r</sup>                                                           | This study |
| <b>pUC19</b>                            | Cloning and sequencing vector for <i>E. coli</i> , Amp <sup>r</sup>                                                                        | [6]        |
| <b>pUC19<math>\Delta</math>3100spec</b> | Vector for gene disruption of <i>ann5</i> , based on pUC19, <i>aadA</i> from pLERE-Spec-oriT, Spec <sup>r</sup>                            | [7]        |
| <b>pUZ8002</b>                          | Helper plasmid for conjugating plasmid containing the <i>oriT</i> sequence, Kana <sup>r</sup>                                              | [8]        |
| <b>pBSK-Nmet</b>                        | Plasmid containing N-MTase encoding gene for subcloning, Amp <sup>r</sup>                                                                  | This study |
| <b>pBSK-SAS16</b>                       | Plasmid containing gene <i>sas16</i> for subcloning, Amp <sup>r</sup>                                                                      | This study |
| <b>pKGLP2-GusA</b>                      | pKCLP2 derivative with <i>gusA</i> gene, Hygr <sup>r</sup>                                                                                 | [9]        |
| <b>pKGLP2-GusA-Nmet::aac3(IV)</b>       | Vector for double crossover of NMTase encoding gene in <i>Streptomyces</i> , Apra <sup>r</sup> , Hygr <sup>r</sup>                         | This study |
| <b>pKGLP2-GusA-SAS16::aac3(IV)</b>      | Vector for double crossover of gene <i>sas16</i> in <i>Streptomyces</i> , Apra <sup>r</sup> , Hygr <sup>r</sup>                            | This study |
| <b>pTESa-SAS16</b>                      | an integrative plasmids pTESa base on $\phi$ 31-based integrase, Apra <sup>r</sup>                                                         | This study |
| <b>pTESa</b>                            | pSET152 derivatives; <i>attP</i> flanked by loxP site, <i>ermEp</i> promoter flanked by <i>tfd</i> terminator sequences, Apra <sup>r</sup> | [9]        |
| <b>pLERECJ</b>                          | Carrying <i>aac(3)IV</i> flanked by loxP-sites, Amp <sup>r</sup> , Apra <sup>r</sup>                                                       | [10]       |
| <b>pUWLCre</b>                          | pUWLoriT derivative carrying <i>cre</i> under <i>ermEp</i> , Hygr <sup>r</sup> , Tsr <sup>r</sup>                                          | [11]       |
| <b>pKC1132-InAnn3</b>                   | Vector for gene disruption of <i>ann3</i> , based on pKC1132, Apra <sup>r</sup>                                                            | This study |

Table S3. Strain constructed and used in this study

| Strain                                                                              | Relevant characteristics                                                                                        | Reference  |
|-------------------------------------------------------------------------------------|-----------------------------------------------------------------------------------------------------------------|------------|
| <b><i>E. coli</i> DH5<math>\alpha</math></b>                                        | General cloning host                                                                                            | Invitrogen |
| <b><i>E. coli</i> ET12567(pUZ8002)</b>                                              | Methylation-deficient <i>E. coli</i> strain for conjugation with the helper plasmid                             | Invitrogen |
| <b><i>E. coli</i> BW25113</b>                                                       | Host for DNA recombination                                                                                      | [10]       |
| <b><i>Streptomyces asterosporus</i> DSM 41452</b>                                   | Wild type strain of WS9326A producer                                                                            | DSMZ       |
| <b><i>Streptomyces asterosporus</i> DSM 41452::pUC19<math>\Delta</math>3100spec</b> | <i>Streptomyces asterosporus</i> DSM 41452 strain containing plasmid pUC19 $\Delta$ 3100spec, Spec <sup>r</sup> | This study |

|                                                                        |                                                                                                                 |            |
|------------------------------------------------------------------------|-----------------------------------------------------------------------------------------------------------------|------------|
| <i>Streptomyces asterosporus</i> DSM 41452::pKC1132-orf(-1)            | Gene <i>orf(-1)</i> inactivation in the WT strain, Apra <sup>r</sup>                                            | This study |
| <i>Streptomyces asterosporus</i> DSM 41452::pKC1132-SAS1               | Gene <i>sas1</i> inactivation in the WT strain, Apra <sup>r</sup>                                               | This study |
| <i>Streptomyces asterosporus</i> DSM 41452::pKC1132-SAS16              | Gene <i>sas16</i> inactivation in the WT strain, Apra <sup>r</sup>                                              | This study |
| <i>Streptomyces asterosporus</i> DSM 41452::pKC1132-SAS13              | Gene <i>sas13</i> inactivation in the WT strain, Apra <sup>r</sup>                                              | This study |
| <i>Streptomyces asterosporus</i> DSM 41452::pKC1132-InAnn3             | Gene <i>ann3</i> inactivation in the WT strain, Apra <sup>r</sup>                                               | This study |
| <i>Streptomyces asterosporus</i> DSM 41452 $\Delta$ sas16              | Gene <i>sas16</i> knockout in the WT strain, Apra <sup>r</sup>                                                  | This study |
| <i>Streptomyces asterosporus</i> DSM 41452 $\Delta$ sas16::pTESa-SAS16 | SAS16 overexpression in the mutant <i>Streptomyces asterosporus</i> DSM 41452 $\Delta$ sas16, Apra <sup>r</sup> | This study |
| <i>Streptomyces asterosporus</i> DSM 41452 $\Delta$ Nmet               | Gene encoding NMTase knockout in the WT strain, Apra <sup>r</sup>                                               | This study |

Table S4. Predicted highly conserved core motifs of A domain binding pockets in NRPSs within the SAS cluster

| Domian   | Residues in the Binding Pocket |     |     |     |     |     |     |     | Amino acid residues |             |
|----------|--------------------------------|-----|-----|-----|-----|-----|-----|-----|---------------------|-------------|
|          | 235                            | 236 | 239 | 278 | 299 | 301 | 322 | 330 | Predicted           | in WS9326As |
| SAS17-A1 | D                              | F   | W   | N   | I   | G   | M   | V   | Thr                 | Thr/Ser     |
| SAS17-A2 | D                              | A   | S   | T   | T   | A   | A   | V   | Tyr                 | Tyr         |
| SAS18-A1 | D                              | A   | Y   | T   | W   | G   | A   | V   | Leu                 | Leu         |
| SAS18-A2 | D                              | A   | W   | T   | V   | A   | A   | V   | Phe                 | Phe         |
| SAS19-A1 | D                              | V   | W   | H   | L   | G   | X   | X   | Ser                 | Ser         |
| SAS19-A2 | D                              | V   | W   | H   | L   | S   | L   | V   | Ser                 | Ser         |
| SAS22-A  | D                              | F   | W   | S   | V   | G   | M   | V   | Thr                 | Thr         |
| SAS23-A  | D                              | L   | T   | K   | V   | G   | E   | V   | Asn                 | Asn         |

Table S5. List of putative biosynthesis genes involved in the biosynthesis of the side chain of the WS9326As and their homologues in the biosynthesis gene cluster of Skyllamycin<sup>[13]</sup>.

| No. | SAS   | Homologues in Skyllamycin gene cluster | Function                            | Identity/Coverage(%) |
|-----|-------|----------------------------------------|-------------------------------------|----------------------|
| 1   | SAS21 | ---                                    | Short chain dehydrogenase/reductase | ---                  |
| 2   | SAS24 | ---                                    | Oxidoreductase                      | ---                  |

|    |       |       |                                       |        |
|----|-------|-------|---------------------------------------|--------|
| 3  | SAS27 | Sky5  | Isomerase                             | 62/99  |
| 4  | SAS28 | Sky4  | Phytoene dehydrogenase/oxidoreductase | 56/96  |
| 5  | SAS29 | Sky16 | Acyl-carrier protein                  | 71/96  |
| 6  | SAS30 | Sky17 | 3-oxoacyl-ACP synthase                | 77/96  |
| 7  | SAS31 | Sky18 | 3-oxoacyl-ACP synthase                | 62/100 |
| 8  | SAS32 | Sky19 | 3-oxoacyl-ACP synthase                | 54/99  |
| 9  | SAS33 | Sky22 | 3-oxoacyl-ACP synthase                | 53/98  |
| 10 | SAS34 | Sky23 | Acyl-carrier protein                  | 55/86  |
| 11 | SAS35 | Sky24 | 3-oxoacyl-ACP dehydratase             | 53/85  |
| 12 | SAS36 | Sky25 | 3-oxoacyl-ACP dehydratase             | 46/99  |
| 13 | SAS37 | Sky26 | 3-oxoacyl-ACP reductase               | 68/100 |
| 14 | SAS7  | ---   | 3-oxoacyl-ACP synthase                | ---    |
| 15 | SAS8  | ---   | 3-oxoacyl-ACP synthase                | ---    |
| 16 | SAS9  | ---   | Acyl-carrier protein                  | ---    |
| 17 | SAS25 | Sky20 | Hydrolase                             | ---    |
| 18 | SAS26 | Sky21 | Thioesterase                          | ---    |
| 19 | ---   | Sky11 | Carboxyltransferase                   | ---    |
| 20 | ---   | Sky13 | ACP-acyltransferase                   | ---    |

Table S6: Proposed Functions of Open Reading Frames of WS9326As Biosynthesis Gene Cluster in *Streptomyces asterosporus* DSM41452.

| Protein | Size(a.a.) | Homologous Protein and origin       | Identity [%] | predicted function                    |
|---------|------------|-------------------------------------|--------------|---------------------------------------|
| Orf(+1) | 220        | SDD75964.1 [Streptomyces emeiensis] | 87%          | DedA family membrane protein          |
| SAS1    | 407        | Cal1 [Streptomyces calvus]          | 99%          | Sensor histidine kinase               |
| SAS2    | 211        | Cal2 [Streptomyces calvus]          | 100%         | LuxR transcriptional regulator        |
| SAS3    | 79         | Cal3 [Streptomyces calvus]          | 99%          | LysR family transcriptional regulator |
| SAS4    | 72         | Cal4 [Streptomyces calvus]          | 99%          | MbtH domain protein                   |
| SAS5    | 248        | Cal5 [Streptomyces calvus]          | 99%          | Thioesterase                          |
| SAS6    | 293        | Cal6 [Streptomyces calvus]          | 99%          | Hypothetical protein                  |
| SAS7    | 334        | Cal7 [Streptomyces calvus]          | 99%          | 3-oxoacyl-ACP synthase II             |
| SAS8    | 413        | Cal8 [Streptomyces calvus]          | 99%          | 3-oxoacyl-ACP synthase II             |
| SAS9    | 83         | Cal9 [Streptomyces calvus]          | 99%          | polyketide-8 synthase ACP             |
| SAS10   | 123        | Cal10 [Streptomyces calvus]         | 100%         | hypothetical protein                  |
| SAS11   | 136        | Cal11 [Streptomyces calvus]         | 100%         | hypothetical protein                  |
| SAS12   | 140        | Cal12 [Streptomyces calvus]         | 99%          | translation initiation factor IF-2    |
| SAS13   | 314        | Cal13 [Streptomyces calvus]         | 99%          | 3-hydroxyacyl-ACP dehydratase         |
| SAS14   | 257        | Cal14 [Streptomyces calvus]         | 98%          | hypothetical protein                  |
| SAS15   | 65         | Cal15 [Streptomyces calvus]         | 100%         | ferredoxin                            |

|         |      |                                            |      |                                                         |
|---------|------|--------------------------------------------|------|---------------------------------------------------------|
| SAS16   | 407  | Cal16 [Streptomyces calvus]                | 100% | cytochrome P450                                         |
| SAS17   | 2567 | Cal17 [Streptomyces calvus]                | 99%  | NRPS(C-A-PCP-C-A-Nmet-PCP)                              |
| SAS18   | 2588 | Cal18 [Streptomyces calvus]                | 99%  | NRPS(C-A-PCP-C-A-PCP-E)                                 |
| SAS19   | 3389 | Cal19 [Streptomyces calvus]                | 99%  | NRPS(C-PCP-C-A-PCP-C-A-PCP-TE)                          |
| SAS20   | 233  | Cal20 [Streptomyces calvus]                | 100% | Thioesterase                                            |
| SAS21   | 274  | Cal21 [Streptomyces calvus]                | 100% | Oxidoreductase                                          |
| SAS22   | 974  | Cal22 [Streptomyces calvus]                | 99%  | NRPS(A-PCP)                                             |
| SAS23   | 601  | Cal23 [Streptomyces calvus]                | 99%  | NRPS(A-PCP)                                             |
| SAS24   | 400  | Cal24 [Streptomyces calvus]                | 99%  | ferredoxin reductase or<br>FAD-dependent oxidoreductase |
| SAS25   | 264  | Cal25 [Streptomyces calvus]                | 99%  | alpha/beta hydrolase                                    |
| SAS26   | 333  | Cal26 [Streptomyces calvus]                | 99%  | Acyl-CoA thioesterase                                   |
| SAS27   | 241  | Cal27 [Streptomyces calvus]                | 99%  | isomerase                                               |
| SAS28   | 574  | Cal28 [Streptomyces calvus]                | 99%  | Dehydrogenase or reductase                              |
| SAS29   | 86   | Cal29 [Streptomyces calvus]                | 99%  | Acyl carrier protein                                    |
| SAS30   | 416  | Cal30 [Streptomyces calvus]                | 99%  | 3-oxoacyl-ACP synthase                                  |
| SAS31   | 379  | Cal31 [Streptomyces calvus]                | 99%  | 3-oxoacyl-ACP synthase                                  |
| SAS32   | 314  | Cal32 [Streptomyces calvus]                | 99%  | 3-oxoacyl-ACP synthase                                  |
| SAS33   | 371  | Cal33 [Streptomyces calvus]                | 99%  | 3-oxoacyl-ACP synthase                                  |
| SAS34   | 87   | Cal34 [Streptomyces calvus]                | 100% | polyketide-8 synthase ACP                               |
| SAS35   | 133  | Cal35 [Streptomyces calvus]                | 99%  | 3-oxoacyl-ACP dehydratase                               |
| SAS36   | 159  | Cal36 [Streptomyces calvus]                | 99%  | 3-oxoacyl-ACP dehydratase                               |
| SAS37   | 248  | Cal37 [Streptomyces calvus]                | 100% | beta-ketoacyl-ACP reductase                             |
| SAS38   | 178  | Cal38 [Streptomyces calvus]                | 100% | tRNA synthetase                                         |
| SAS39   | 318  | Cal39 [Streptomyces calvus]                | 99%  | ABC transporter                                         |
| SAS40   | 280  | Cal40 [Streptomyces calvus]                | 100% | multidrug ABC transporter permease                      |
| Orf(-1) | 319  | WP_040907349.1 [Streptomyces griseoflavus] | 91%  | transcriptional regulator                               |
| Orf(-2) | 358  | KES07412.1 [Streptomyces toyocaensis]      | 81%  | polyprenyl diphosphate synthase                         |
| Orf(-3) | 717  | WP_004931928.1 [Streptomyces griseoflavus] | 93%  | putative drug exporter                                  |

Table S7. Summary of NMR Data for WS9326A and WS9326F in DMSO-*d*<sub>6</sub>

| position | WS9326A    |            | WS9326F    |            |      |
|----------|------------|------------|------------|------------|------|
|          | $\delta_H$ | $\delta_C$ | $\delta_H$ | $\delta_C$ | HMBC |

2017/11/17

|                                      |     |                      |       |                         |       |                     |
|--------------------------------------|-----|----------------------|-------|-------------------------|-------|---------------------|
| <b>Acyl</b>                          | 1   |                      | 165.7 |                         | 165.6 |                     |
|                                      | 2   | 6.69,1H,d(15.5)      | 123.0 | 6.88, 1H, d(15.1)       | 128.5 |                     |
|                                      | 3   | 7.42,1H,d(15.5)      | 127.7 | 7.53, 1H, d(15.1)       | 137.4 | 165.6               |
|                                      | 4   |                      | 133.5 |                         |       |                     |
|                                      | 5   | 7.20,1H,m            | 126.5 | -                       |       |                     |
|                                      | 6   | 7.26,1H              | 127.2 | -                       |       |                     |
|                                      | 7   | 7.27,1H              | 128.8 | -                       |       |                     |
|                                      | 8   | 7.20,1H              | 130.1 | -                       |       |                     |
|                                      | 9   |                      | 139.1 |                         |       |                     |
|                                      | 10  | 6.50,1H,d(11.4)      | 127.4 | 6.53, 1H, d(11.4)       | 127.1 | 30.4                |
|                                      | 11  | 5.83,1H,dt(11.4,7.4) | 134.7 | 5.79, 1H, dt(11.4, 7.4) | 134.5 |                     |
|                                      | 12  | 1.98,2H,m            | 30.5  | 1.98, 2H, m             | 30.4  | 127.1, 134.5, 22.1  |
|                                      | 13  | 1.36,2H,m            | 22.7  | 1.34, 2H, m             | 22.1  | 134.5, 30.4, 14.2   |
|                                      | 14  | 0.80,3H,t(7.2)       | 14.2  | 0.79, 3H, t(7.3)        | 14.2  | 30.4, 22.1          |
| <b><sup>1</sup>Thr</b>               | NH  | 8.73,1H,d(9.4)       |       | -                       |       |                     |
|                                      | α   | 5.33,1H,t(9.8)       | 53.6  | 4.29, 1H                | 52.4  |                     |
|                                      | β   | 5.02,1H,dq(9.8,6.2)  | 73.9  | 3.69, 1H                | 66.9  |                     |
|                                      | γ   | 1.15,3H,d(6.0)       | 17.3  | 1.05, 3H, brs           | 20.3  | 52.4, 66.9          |
|                                      | C=O |                      | 169.4 |                         | 170.8 |                     |
| <b><sup>2</sup> Δ<br/>MeT<br/>yr</b> | NMe | 2.98,3H,s            | 34.9  | 2.87, 3H,s              | 34.8  | 170.8               |
|                                      | α   |                      | 128.4 |                         | 130.1 |                     |
|                                      | β   | 6.13,1H,s            | 132.1 | 6.63, 1H, s             | 132.3 | 165.2, 132.2        |
|                                      | 1   |                      | 123.4 |                         | 124.0 |                     |
|                                      | 2,6 | 7.39,2H,d(8.6)       | 132.3 | 7.27, 2H, d(8.0)        | 132.2 | 130.1, 132.3, 158.5 |
|                                      | 3,5 | 6.58,2H,d(8.6)       | 115.4 | 6.65, 2H, d(8.0)        | 115.4 | 124.0, 158.5        |
|                                      | 4   |                      | 158.5 |                         | 158.5 |                     |
|                                      | C=O |                      | 166.1 |                         | 165.2 |                     |
| <b><sup>3</sup>Leu</b>               | NH  | 9.25,1H.br.s         |       | -                       |       |                     |
|                                      | α   | 4.07,1H,m            | 54.1  | 4.49                    | 49.6  |                     |
|                                      | β   | 1.26,2H,m            | 39.7  | 1.23, 2H, m             | 40.1  |                     |
|                                      | γ   | 0.85,1H,m            | 24.0  | 0.81, 1H, m             | 24.0  |                     |
|                                      | σ   | 0.76,3H              | 22.6  | 0.70, 3H                | 22.6  | 49.6, 40.1          |



2017/11/17

|                        |                      |                        |               |                            |               |              |
|------------------------|----------------------|------------------------|---------------|----------------------------|---------------|--------------|
|                        | C=O                  | 0.63,3H                | 23.3<br>172.5 | 0.65,3H                    | 23.3<br>171.8 |              |
| <b><sup>4</sup>Phe</b> | NH                   | 9.17,1H,d(8.0)         |               | -                          |               |              |
|                        | α                    | 4.33,1H,m              | 56.5          | 4.62,1H, m                 | 54.6          |              |
|                        | β                    | 3.28,1H,m<br>2.72,1H,m | 36.8          | 3.11, 1H, m<br>2.65, 1H, m | 38.4          | 138.1        |
|                        | 1                    |                        | 139.1         |                            | 138.1         |              |
|                        | 2,6                  | 7.33,2H,d              | 129.4         | 7.35, 2H, m                | 129.4         | 138.1, 127.2 |
|                        | 3,5                  | 7.28,2H,d              | 128.4         | 7.27, 2H, m                | 128.4         |              |
|                        | 4                    |                        | 127.2         |                            | 127.2         |              |
|                        | C=O                  |                        | 170.6         |                            | -             |              |
| <b><sup>5</sup>Thr</b> | NH                   | 7.59,1H,d(9.8)         |               |                            |               |              |
|                        | α                    | 4.34,1H,m              | 56.8          | 4.23, 1H, m                | 58.7          | 170.4        |
|                        | β                    | 4.28,1H,m              | 68.6          | 4.02, 1H, m                | 67.5          |              |
|                        | γ                    | 0.63,3H                | 22.7          | 0.92, 3H                   | 22.7          |              |
|                        | OH                   | 5.18,1H,d(3.0)         |               | -                          |               |              |
|                        | C=O                  |                        | 170.4         |                            | 170.4         |              |
| <b><sup>6</sup>Asn</b> | NH                   | 8.34,1H,d(7.3)         |               | -                          |               |              |
|                        | α                    | 4.44,1H,m              | 51.3          | 3.17, 1H, m                | 48.8          |              |
|                        | β                    | 2.45,2H                | 37.2          | 2.45, 2H                   | 37.2          | 48.8, 171.2  |
|                        | γ (C=O)              |                        | 171.6         |                            | 171.2         |              |
|                        | γ (NH <sub>2</sub> ) | 6.93,1H, 7.30,1H       |               | -                          |               |              |
|                        | C=O                  |                        | 172.0         |                            | -             |              |
| <b><sup>7</sup>Ser</b> | NH                   | 8.49,1H,d(9.5)         |               |                            |               |              |
|                        | α                    | 4.34,1H                | 56.9          |                            |               |              |
|                        | β                    | 3.15,1H<br>3.24,1H     | 61.5          |                            |               |              |
|                        | OH                   | 4.79,1H,br             |               |                            |               |              |
|                        | C=O                  |                        | 169.3         |                            |               |              |

Note: Signal assignments based on the 1D and 2D NMR data.

Table S8. Summary of  $^1\text{H}$  NMR(400MHz) and  $^{13}\text{C}$  NMR(100MHz) Data for Annimycin B in  $\text{CDCl}_3$

| Position     | $\delta_{\text{C}}$ | $\delta_{\text{H}}$     | COSY   | HMBC          |
|--------------|---------------------|-------------------------|--------|---------------|
| <b>1</b>     | 165.4               |                         |        |               |
| <b>2</b>     | 118.7               | 5.97, d, 14.9Hz         | H3     | C1, C4        |
| <b>3</b>     | 145.3               | 7.38, dd, 14.9, 11.3 Hz | H2, H4 | C1, C5        |
| <b>4</b>     | 123.3               | 6.24, dd, 15.3, 11.3 Hz | H5     |               |
| <b>5</b>     | 147.5               | 6.62, d, 15.3 Hz        |        |               |
| <b>6</b>     | 133.3               |                         |        |               |
| <b>6a</b>    | 12.2                | 1.79, s                 |        | C5, C7        |
| <b>7</b>     | 141.4               | 5.76, t, 7.4            | H8     | C5            |
| <b>8</b>     | 22.1                | 2.21, m                 | H7, H9 |               |
| <b>9</b>     | 13.8                | 1.04, t, 7.3            | H8     | C7            |
| <b>NH</b>    |                     | 7.49,s                  |        | C5', C1'      |
| <b>1'</b>    | 115.2               |                         |        |               |
| <b>2'</b>    | 174.5               |                         |        |               |
| <b>2'-OH</b> |                     | 13.7, s                 |        | C1', C2', C3' |
| <b>3'</b>    | 25.7                | 2.62, m                 | H4'    |               |
| <b>4'</b>    | 32.3                | 2.53, m                 | H3'    | C2', C5'      |
| <b>5'</b>    | 197.7               |                         |        |               |

Figure S1.

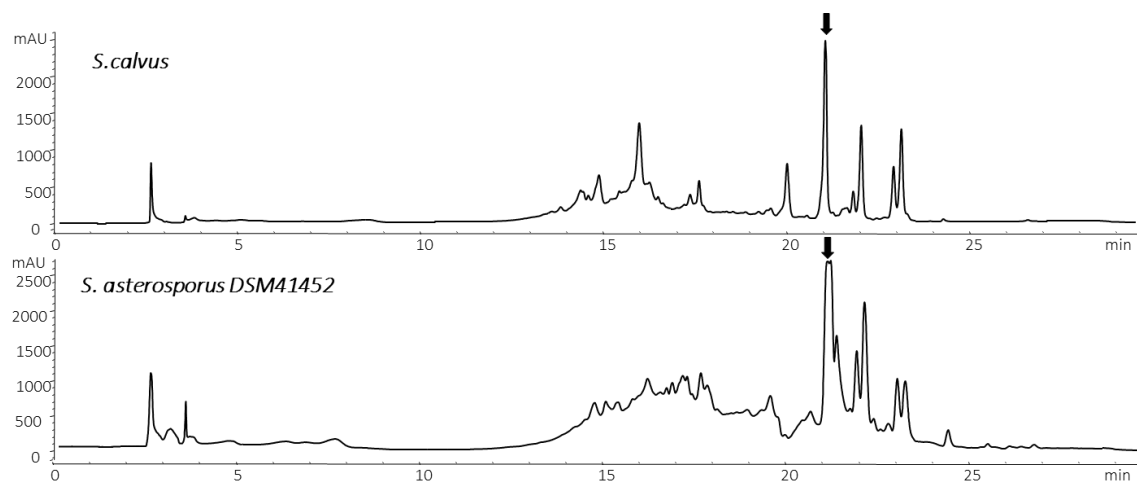

**Figure S1.** Comparative HPLC Profiles analysis of extracts from the cultures of *Streptomyces calvus* ATCC 13382 and *Streptomyces asterosporus* DSM 41452. The peak of WS9326A is marked with an arrow.

Figure S2.

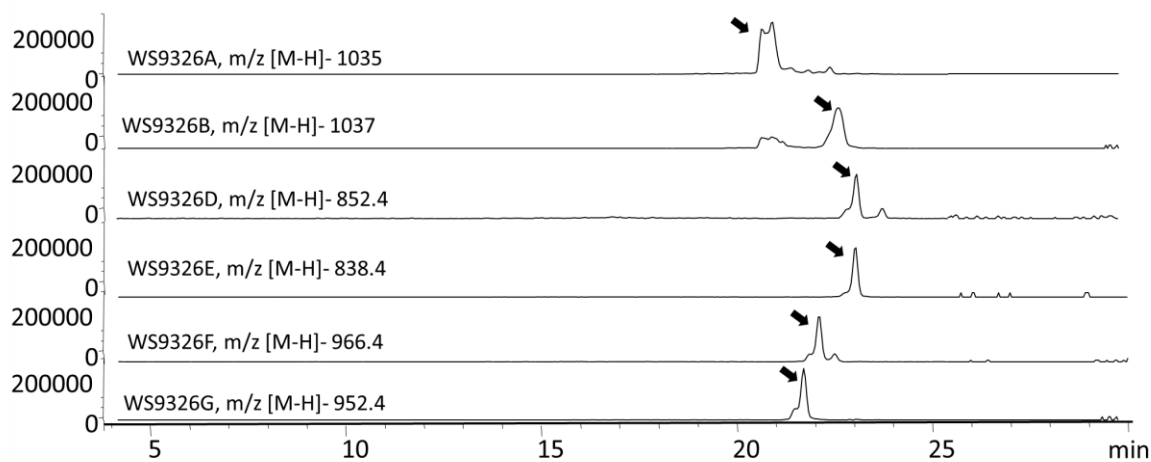

**Figure S2.** HPLC-MS analysis of the cultures of the *Streptomyces asterosporus* DSM 41452. (A) Chromatogram monitored at 254 nm. (B) Corresponding extracted ion chromatograms for WS9326A, B, D, E, F, and G. The peaks of interest are marked with an arrow.

Figure S3.

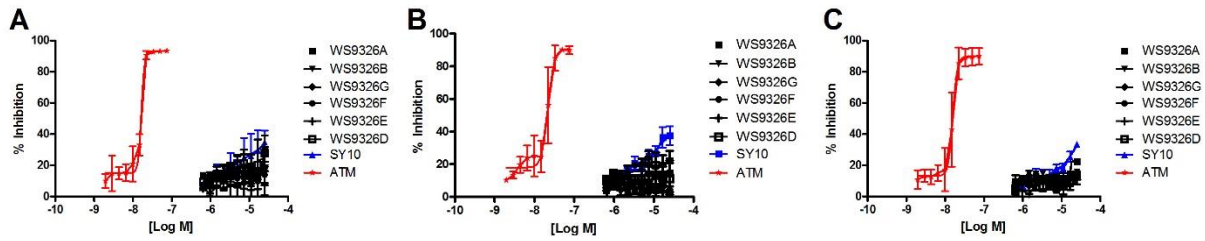

**Figure S3.** Drug response phenotypes for *Plasmodium falciparum* Dd2 (A), HB3 (B) and 3D7 (C) strains. Anmimycin B was the only compound that demonstrate significant antimalarial growth inhibition, with ~30% growth inhibition, against all three strains at the highest concentration tested (25  $\mu$ M). Artemether (ATM) is shown as a positive antimalarial control. The results shown are the average of three independent experiments conducted in duplicate per concentration, shown as the mean and standard error.

Figure S4.

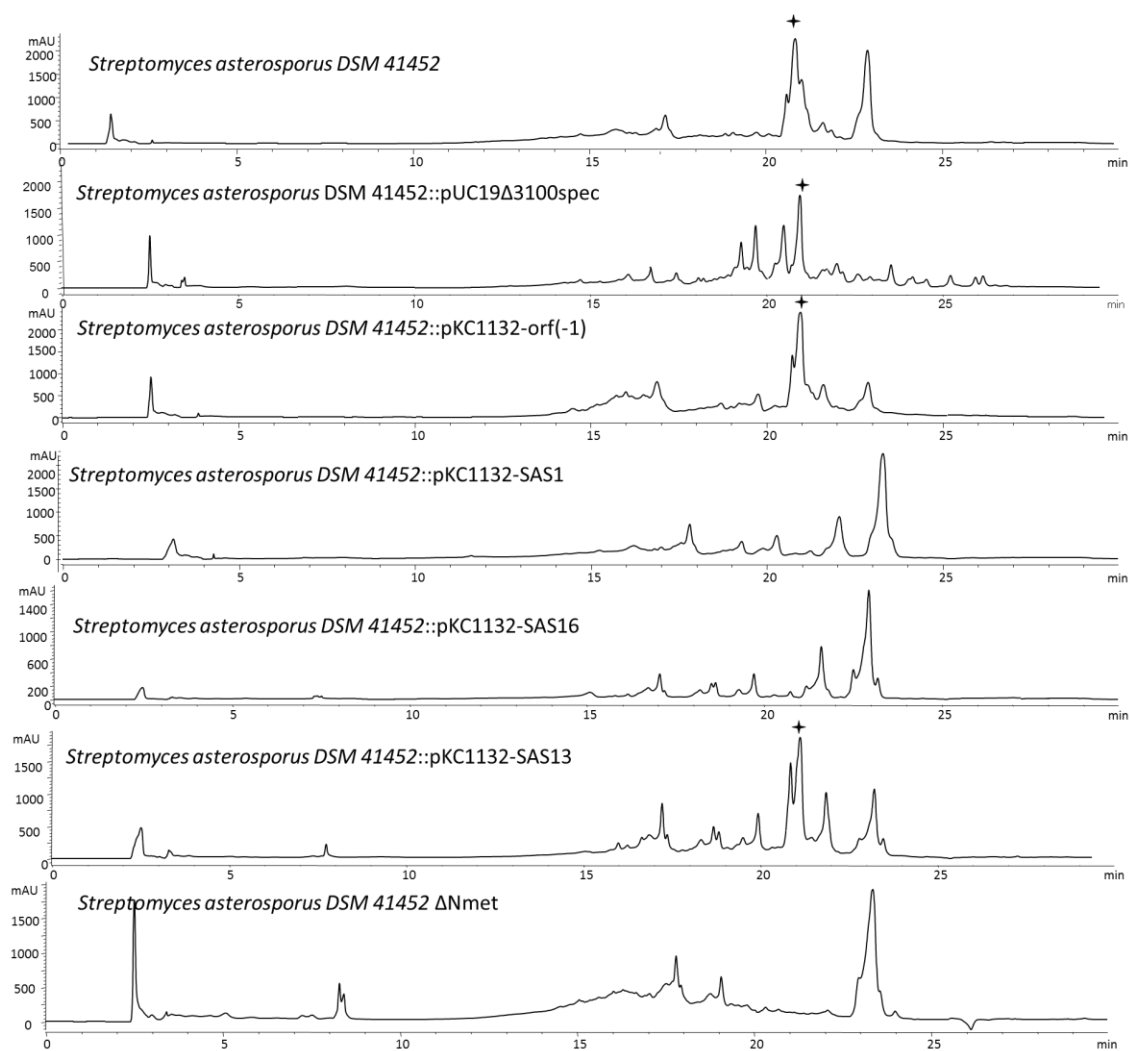

**Figure S4.** HPLC chromatograms of *Streptomyces asterosporus* DSM 41452 and its mutant strains (monitored at 254nm wavelength). The peak corresponding to WS9326A is marked with a star.

Figure S5.

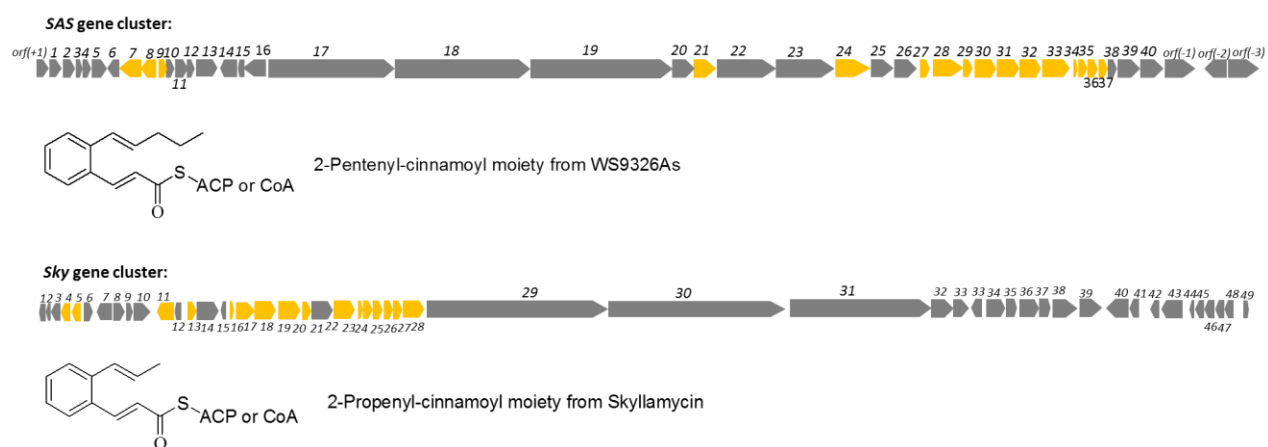

**Figure S5.** Comparison of the gene clusters encoding the cinnamoyl side chain biosynthesis in the SAS and SKY gene clusters (highlighted in yellow).

Figure S6.

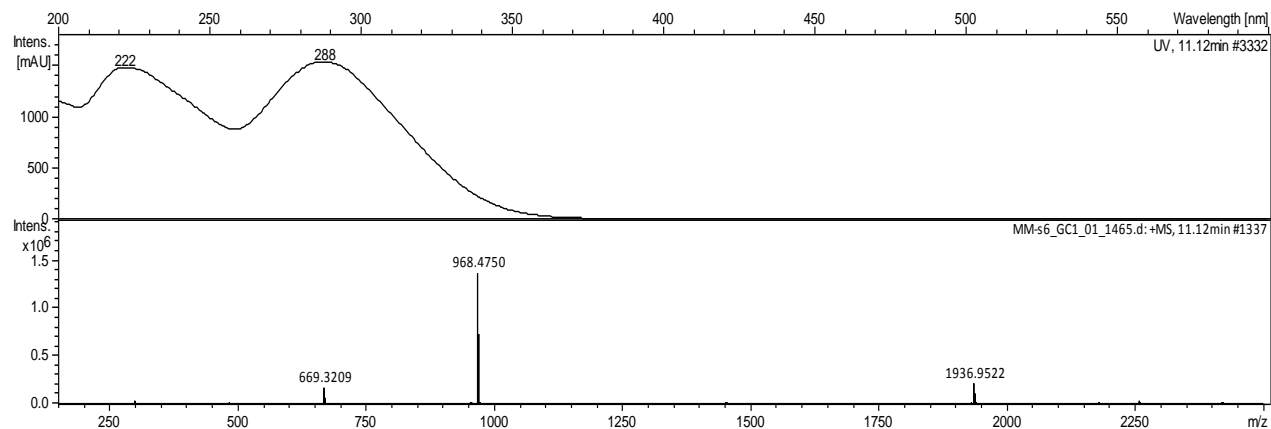

Figure S6. UV-Visible spectrum and HR-ESI-MS spectrum of WS9326F

Figure S7.

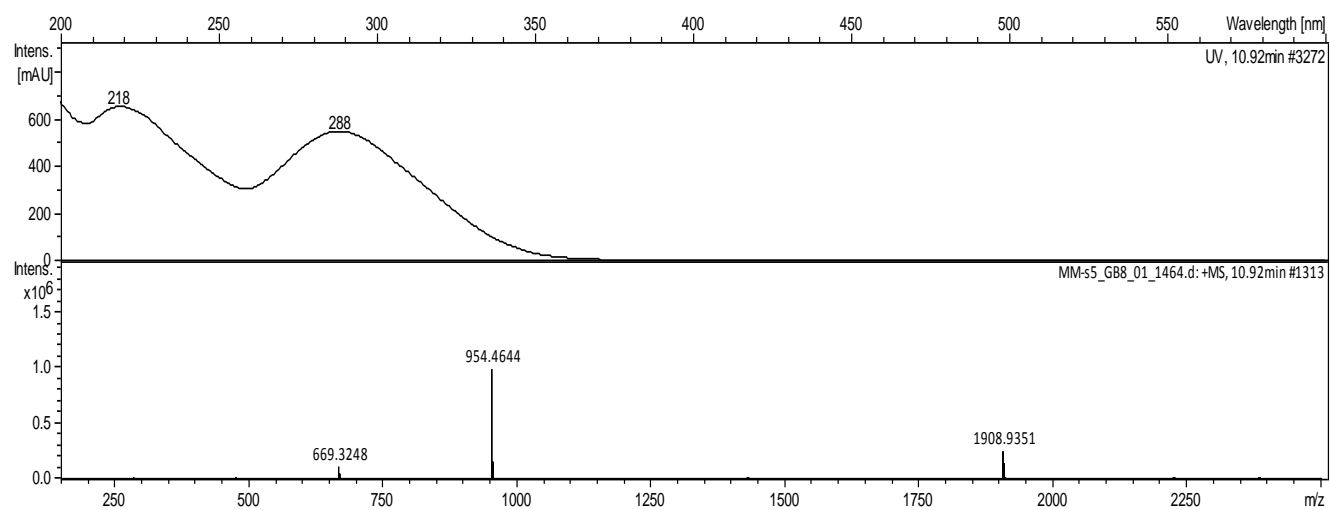

Figure S7. UV-Visible spectrum and HR-ESI-MS spectrum of WS9326G

Figure S8.

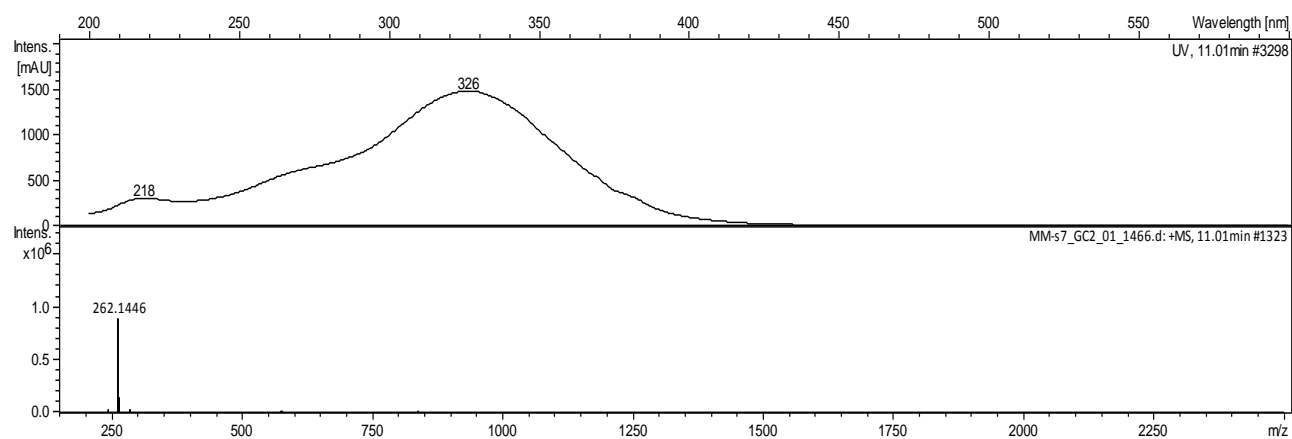

Figure S8. UV-Vis spectrum and HR-ESI-MS spectrum of Annimycin B

Figure S9.

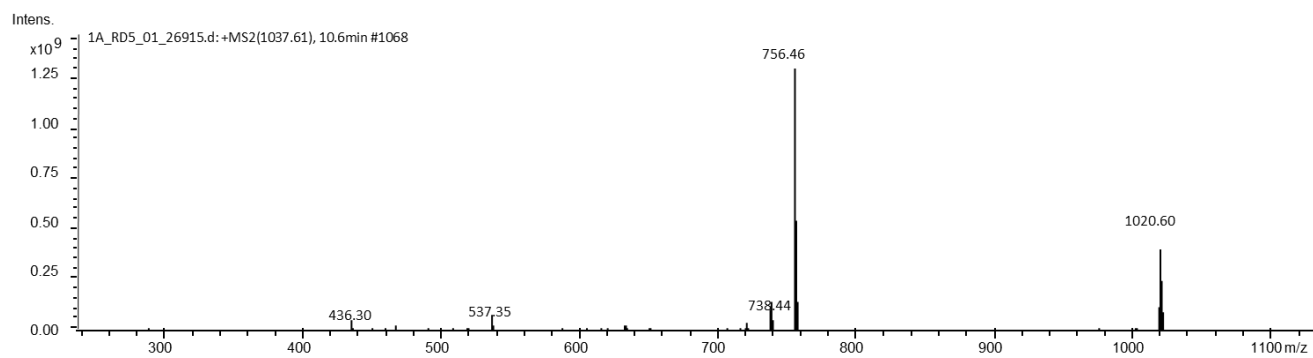

Figure S9. ESI-MS/MS spectrum of WS9326A



Figure S10.

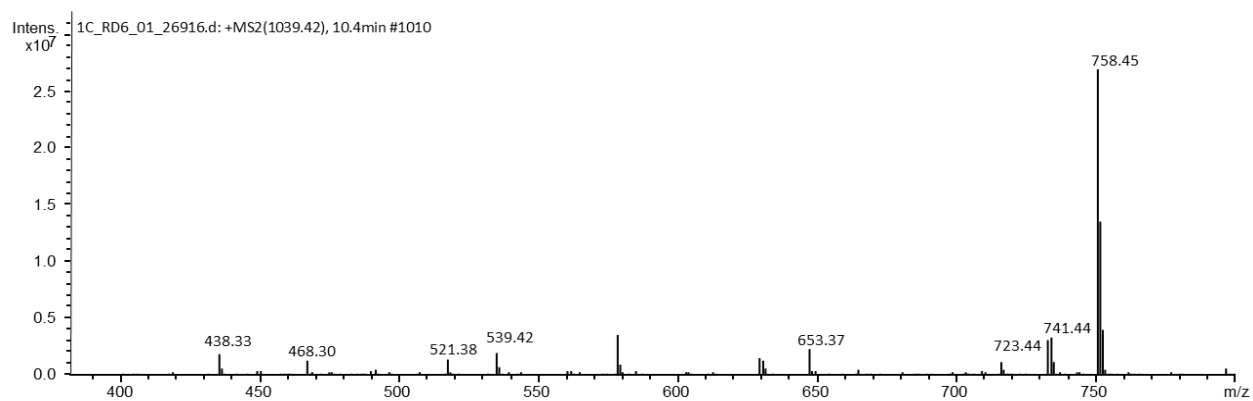

Figure S10. ESI-MS/MS spectrum of WS9326B

Figure S11.

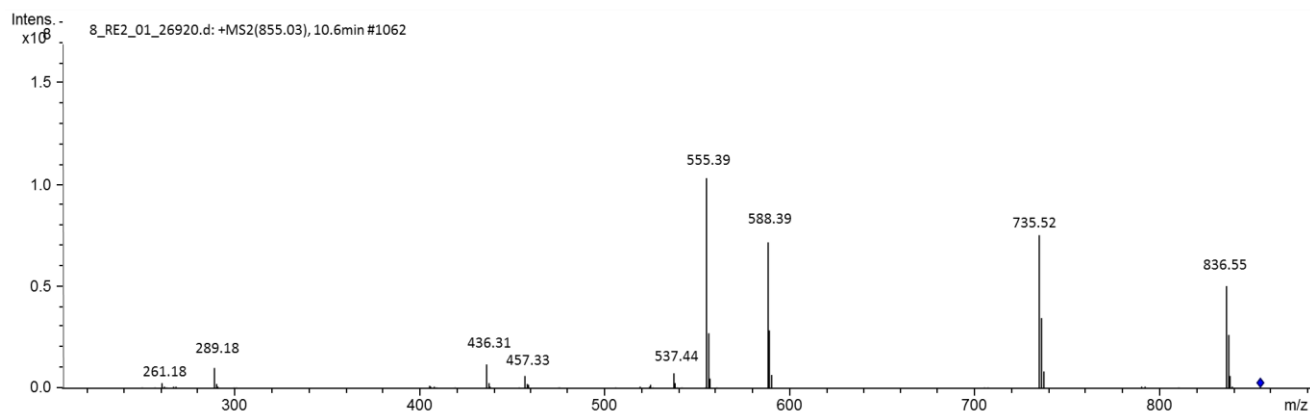

Figure S11. ESI-MS/MS spectrum of WS9326D

Figure S12.

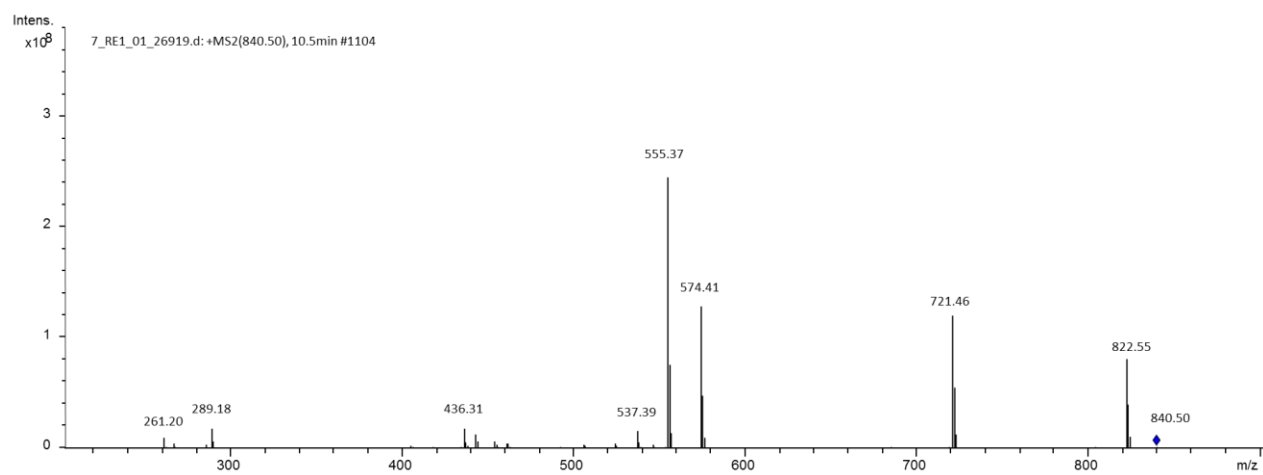

Figure S12. ESI-MS/MS spectrum of WS9326E

Figure S13.

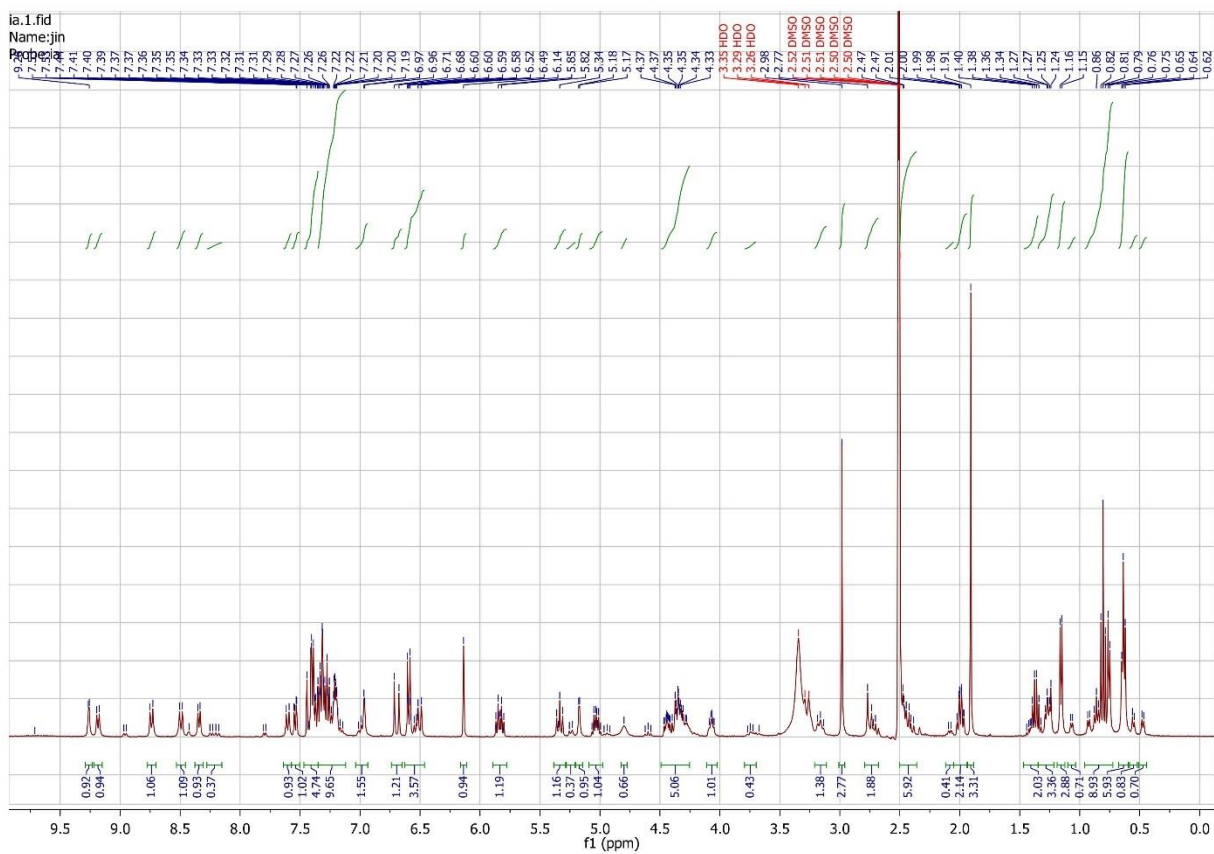Figure S13. <sup>1</sup>H NMR spectrum of WS9326A

Figure S14.

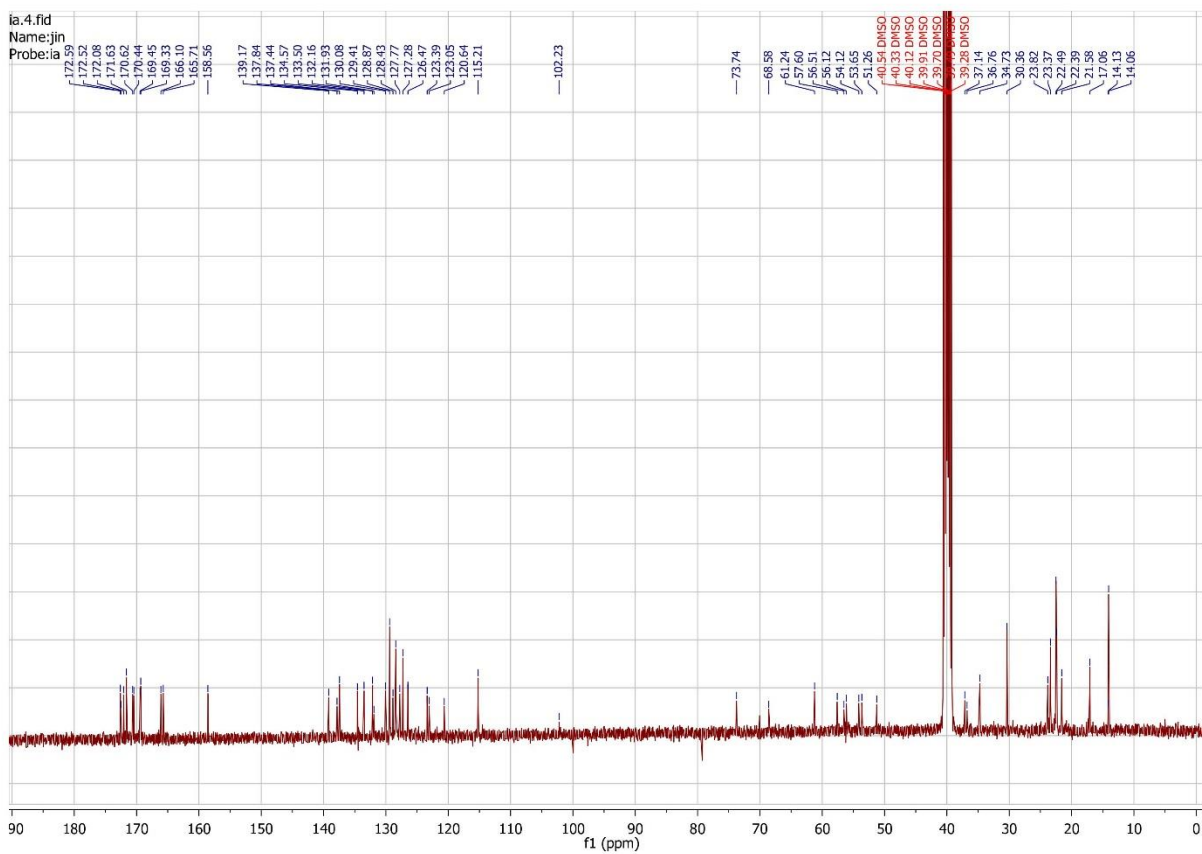

Figure S14. C NMR spectrum of WS9326A

Figure S15.

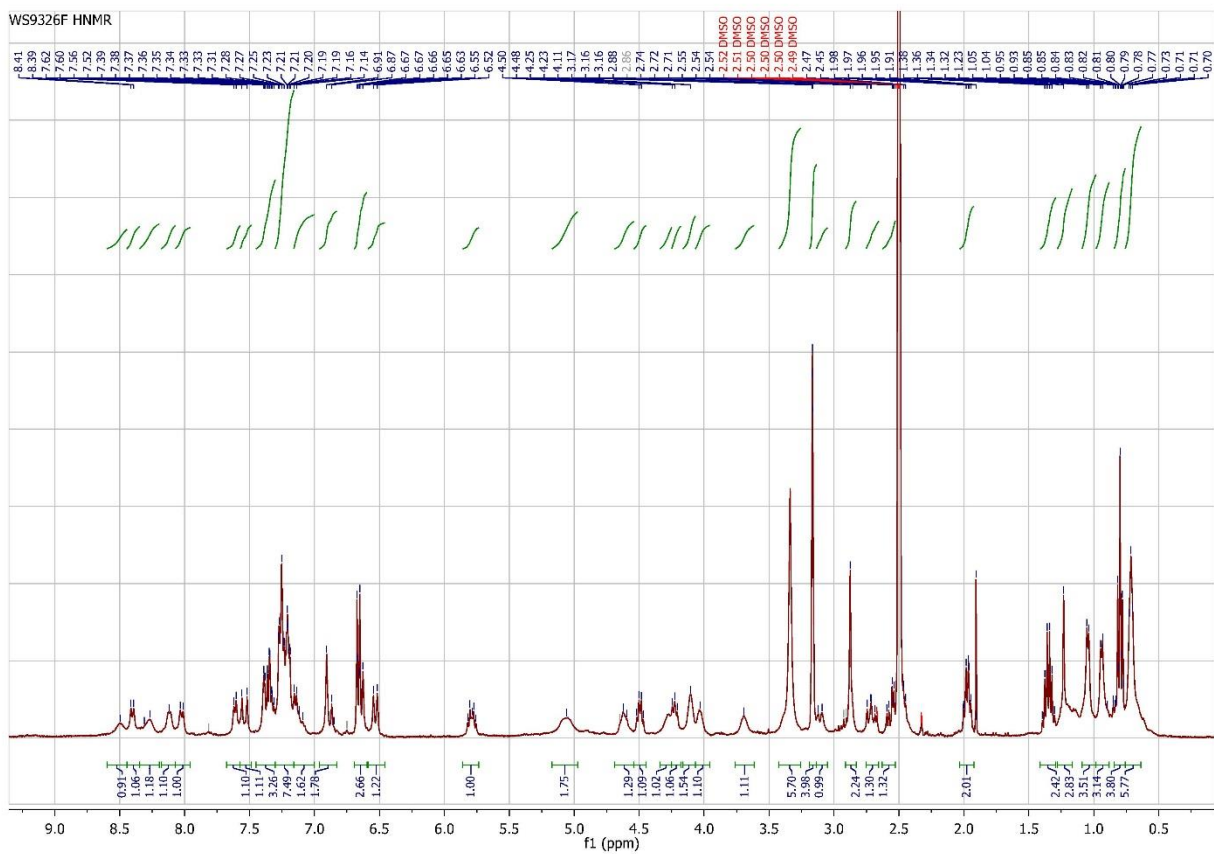Figure S15. <sup>1</sup>H NMR spectrum of WS9326F

Figure S16.

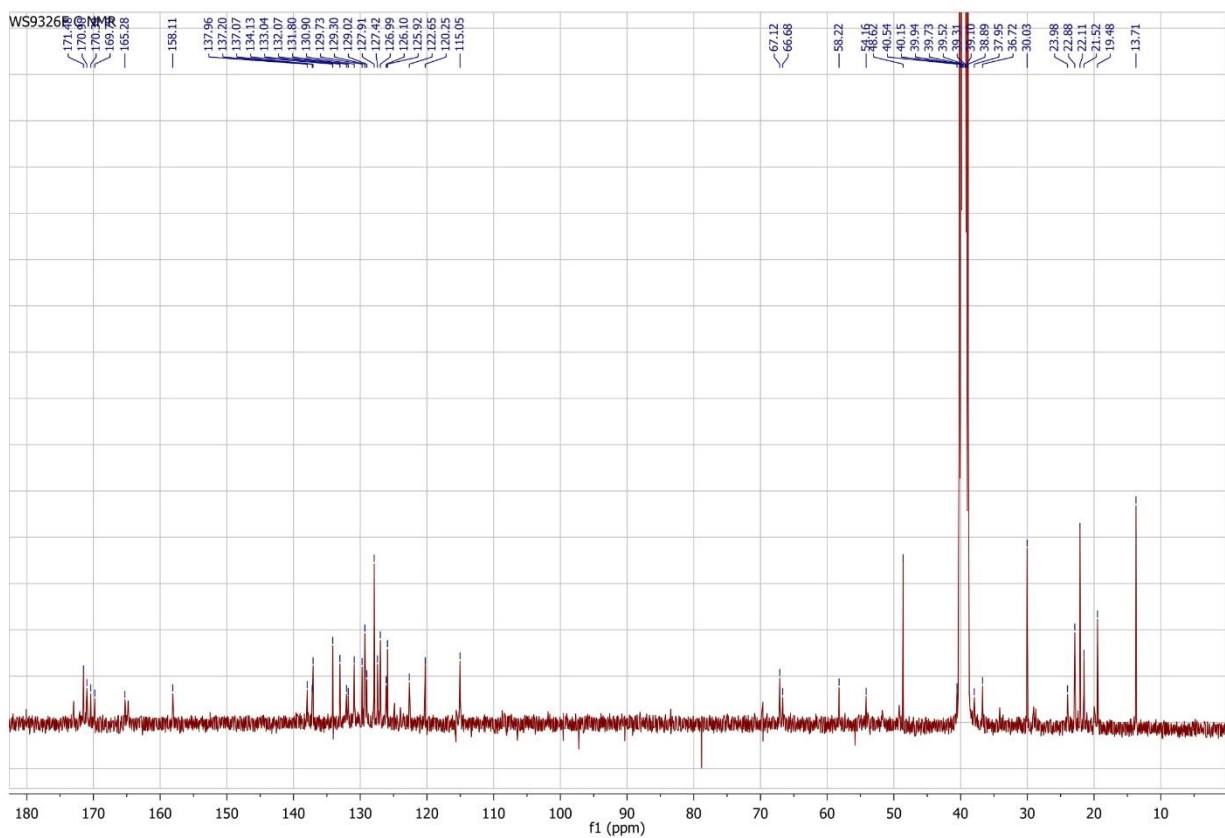

Figure S16. C NMR spectrum of WS9326F

Figure S17.

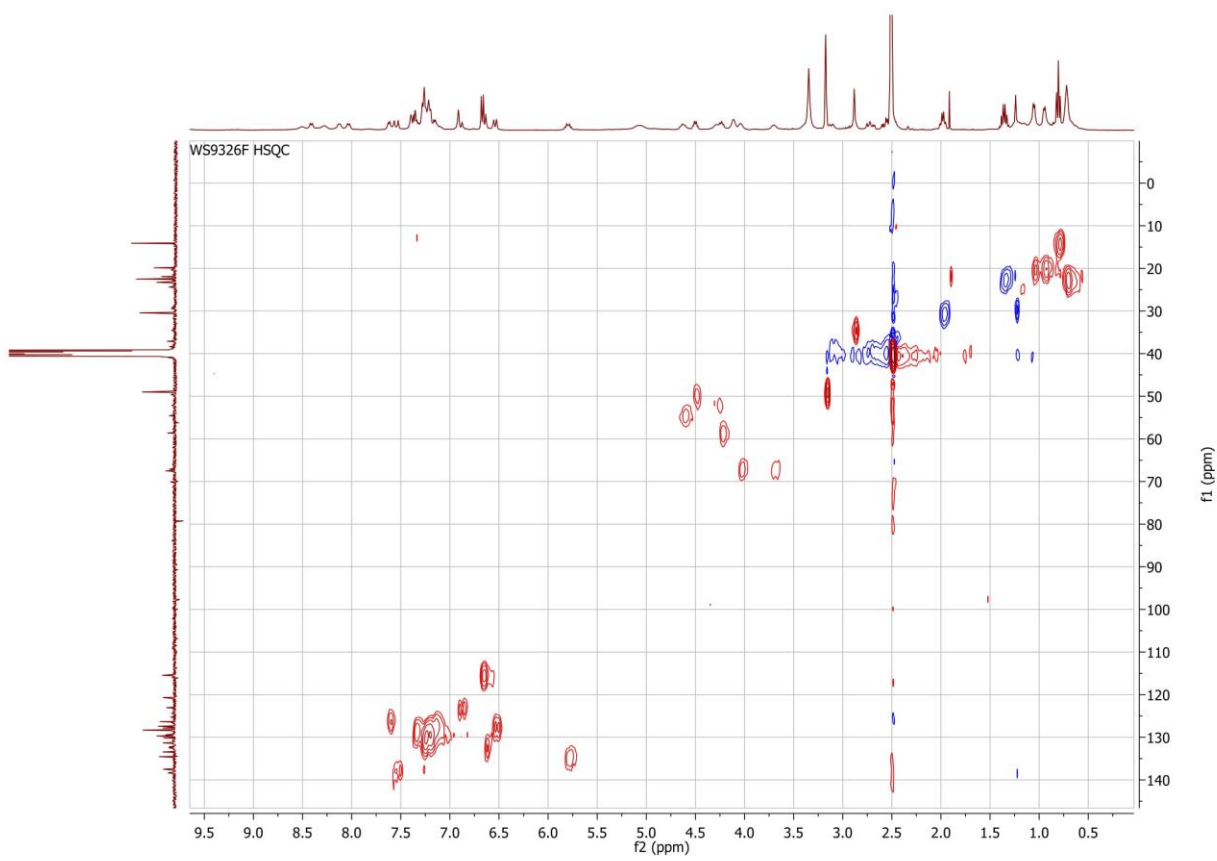

Figure S17. HSQC spectrum of WS9326F

Figure S18.

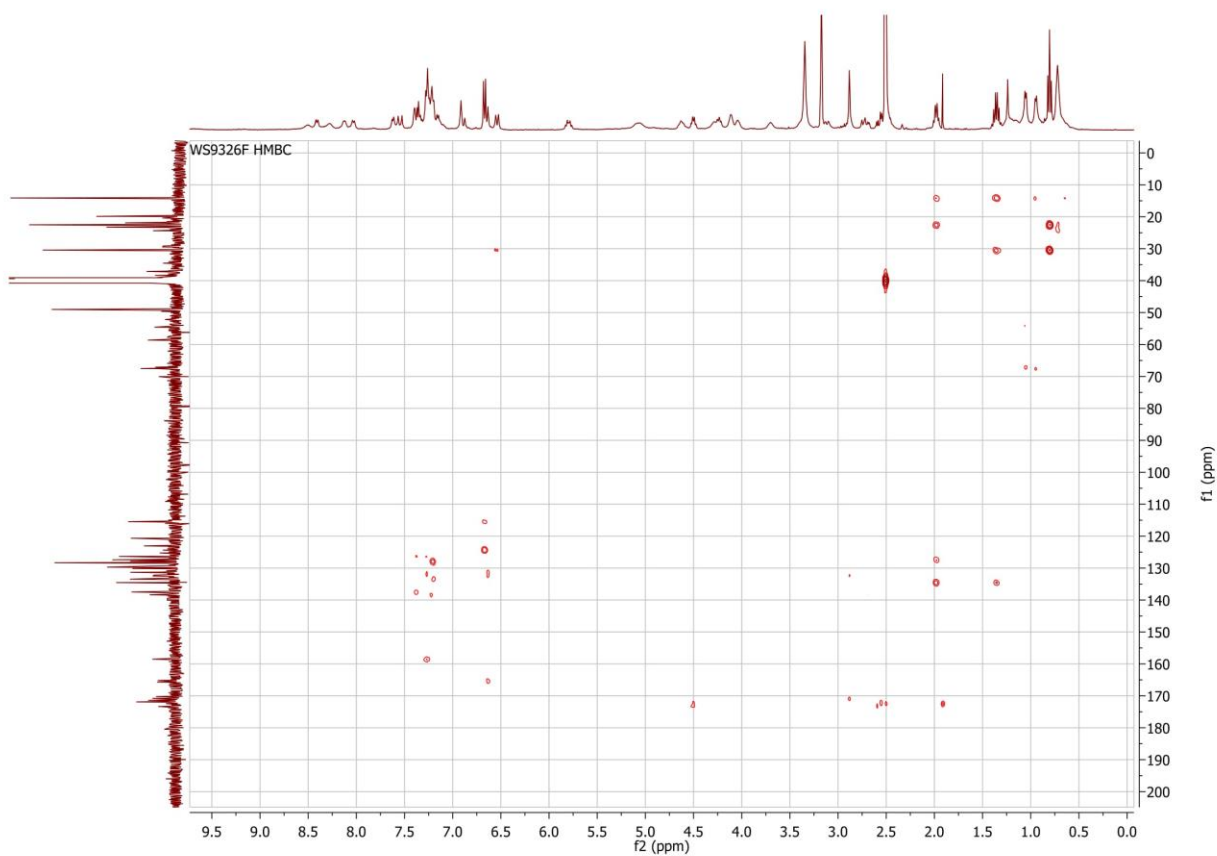

Figure S8. HMBC spectrum of WS9326F



Figure S19.

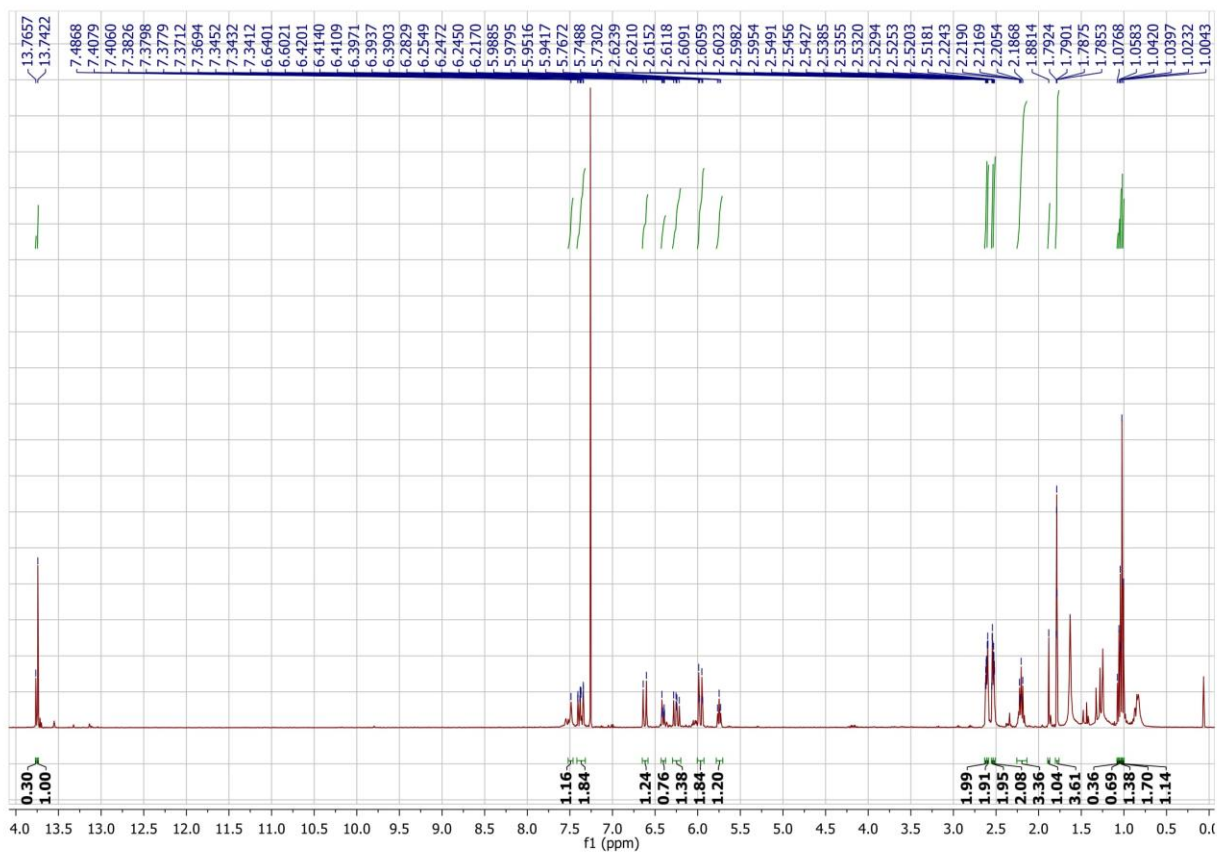Figure S19. <sup>1</sup>H NMR spectrum of Annimycin B

Figure S20.

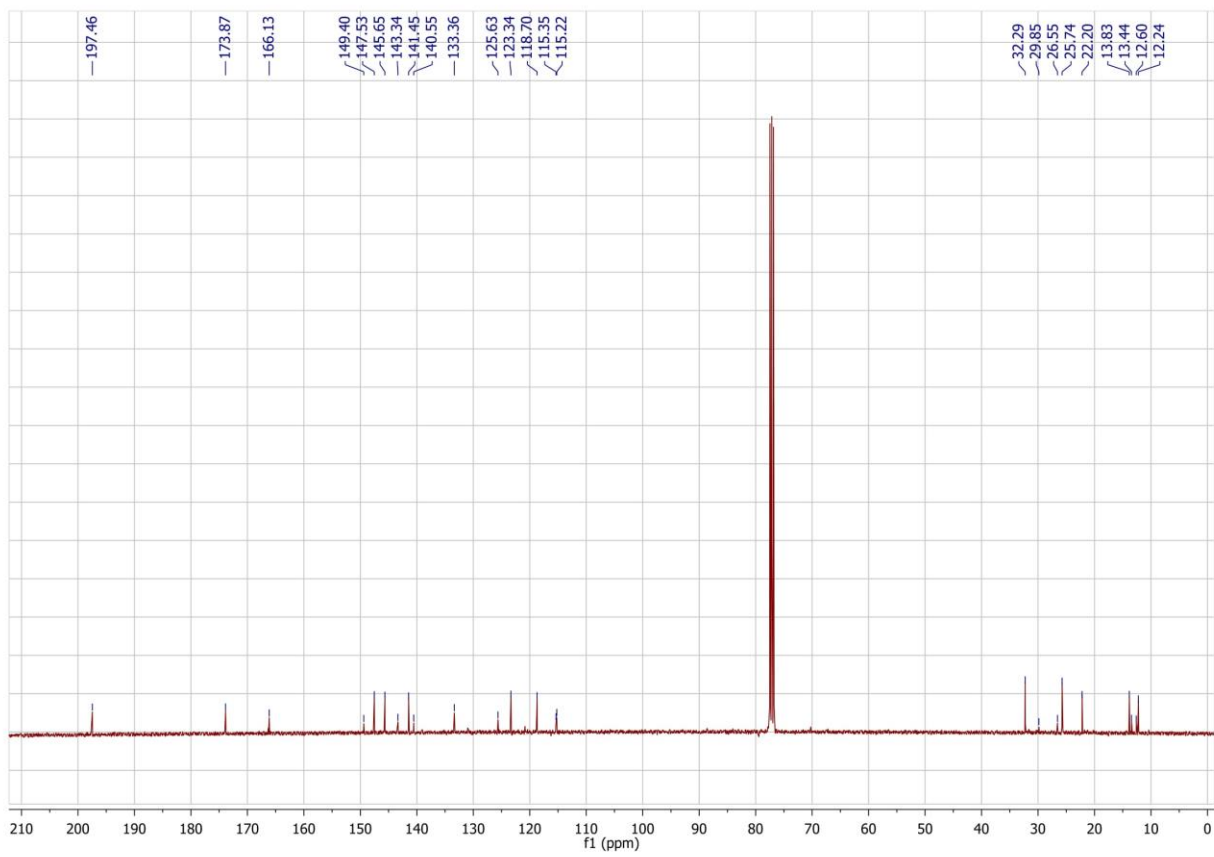

Figure S20. C NMR spectrum of Annimycin B

Figure S21.

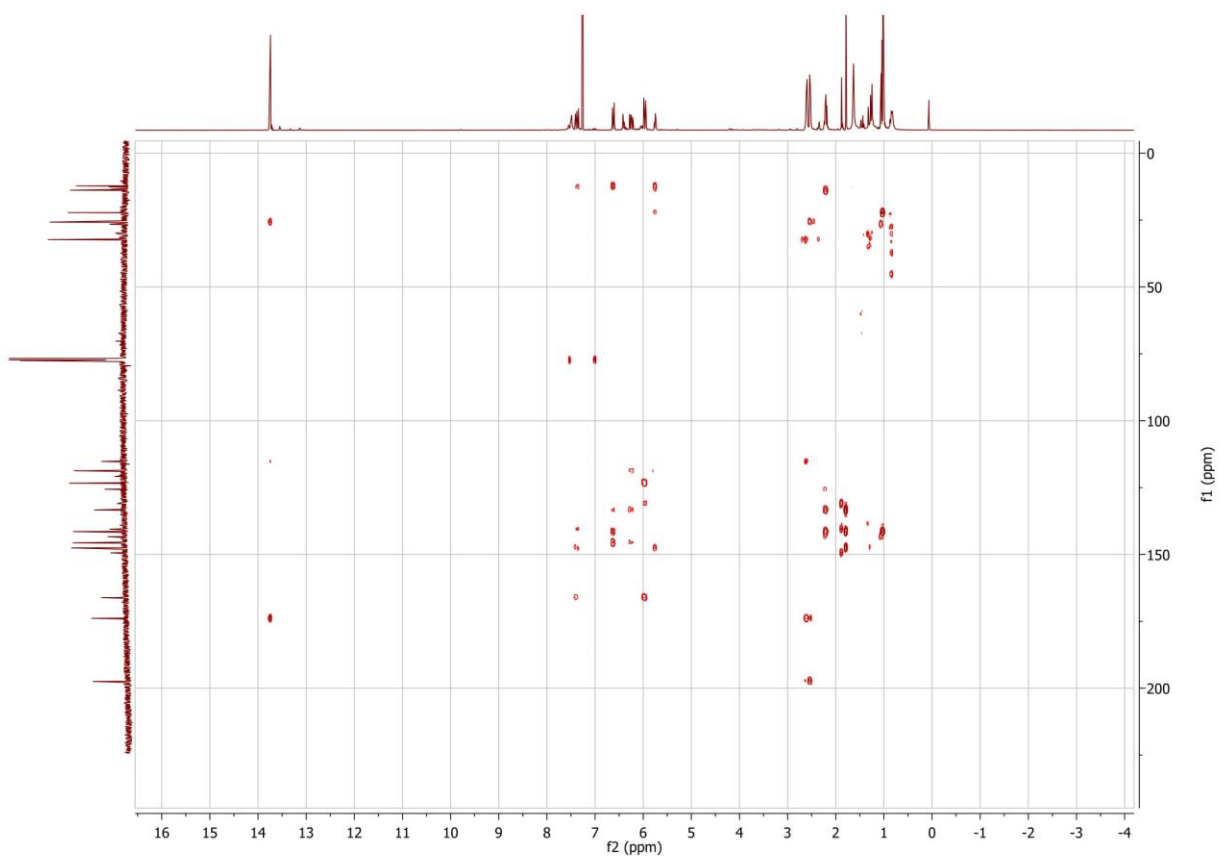

Figure 21. HMBC spectrum of Anrimycin B

Figure S22.

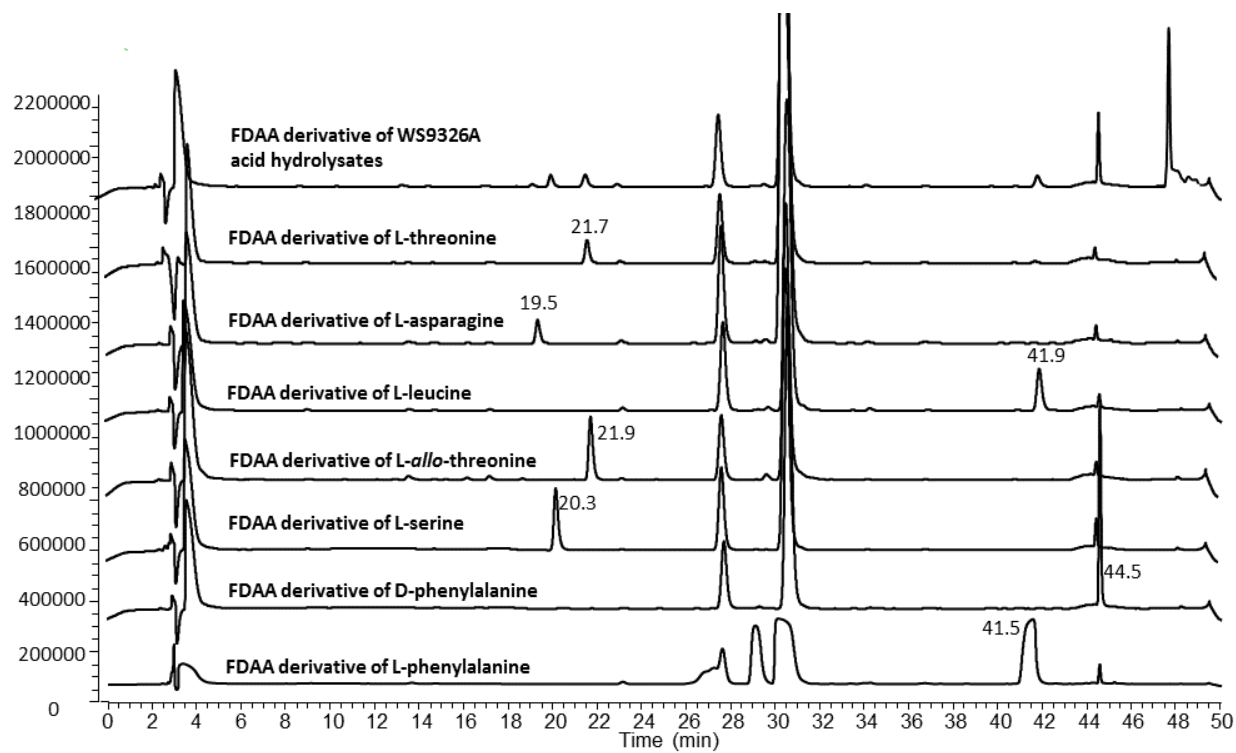

**Figure S22.** HPLC chromatogram of FDAA derivative of WS9326A and the corresponding standard amino acids (number representing the retention time). The eluent for each chromatogram was monitored at 256 nm. Retention times for FDAA derivatives are shown next to the respective peaks.

## Reference:

- [1] P. Marfey, *Carlsberg Res Commun* **1984**, *49*, 591-596.
- [2] W. Trager, J. B. Jensen, *Science* **1976**, *193*, 673-675.
- [3] a) R. E. Desjardins, C. Canfield, J. Haynes, J. Chulay, *Antimicrob Agents Chemother* **1979**, *16*, 710-718; b) M. Smilkstein, N. Sriwilaijaroen, J. X. Kelly, P. Wilairat, M. Riscoe, *Antimicrob Agents Chemother* **2004**, *48*, 1803-1806.
- [4] B. Gust, G. L. Challis, K. Fowler, T. Kieser, K. F. Chater, *Proc Natl Acad Sci* **2003**, *100*, 1541-1546.
- [5] M. Bierman, R. Logan, K. O'Brien, E. T. Seno, R. N. Rao, B. E. Schoner, *Gene* **1992**, *116*, 43-49.
- [6] C. Yanischperron, J. Vieira, J. Messing, *Gene* **1985**, *33*, 103-119.
- [7] L. Kalan, A. Gessner, M. N. Thaker, N. Waglechner, X. Zhu, A. Szawiola, A. Bechthold, G. D. Wright, D. L. Zechel, *Chem Biol* **2013**, *20*, 1214-1224.
- [8] D. A. Hopwood, M. J. Bibb, K. F. Chater, T. Kieser, C. J. Bruton, H. M. Kieser, D. J. Lydiate, C. P. Smith, J. M. Ward, H. and Schrempf, *Genetic manipulation of streptomyces: A laboratory manual.*, The John Innes Foundation., Norwich, **1985**.
- [9] S. Herrmann, T. Siegl, M. Luzhetska, L. Petzke, C. Jilg, E. Welle, A. Erb, P. F. Leadlay, A. Bechthold, A. Luzhetsky, *Appl Environ Microb* **2012**, *78*, 1804-1812.

- [10] R. Makitrynsky, B. Ostash, O. Tsyplik, Y. Rebets, E. Doud, T. Meredith, A. Luzhetskyy, A. Bechthold, S. Walker, V. Fedorenko, *Open Biol* **2013**, *3*, 130121.
- [11] M. Fedoryshyn, E. Welle, A. Bechthold, A. Luzhetskyy, *Appl Microbiol Biotechnol* **2008**, *78*, 1065-1070.
- [12] D. Hanahan, *J Mol Biol* **1983**, *166*, 557-580.
- [13] S. Pohle, C. Appelt, M. Roux, H. P. Fiedler, R. D. Sussmuth, *J Am Chem Soc* **2011**, *133*, 6194-6205.
